# Supplementary material for: Decoding the bare necessities of decapod crustacean nomenclature through the ages
Source: PeerJ. 2025 Nov 11;13:e20337. doi: 10.7717/peerj.20337 (PMC12617372; doi:10.7717/peerj.20337)
Supplement: Supplemental Information 1 [file peerj-13-20337-s001.xlsx]

## Sheet: Sheet1
ScientificName	Authority	Etymology
Odontonia bagginsi	De Gier & Fransen, 2018	Culture/Past
Uroptychus paracrassior	Ahyong & Poore, 2004	Geography
Hippolyte palliola	Kensley, 1970	Morphology-Shape
Potamiscus (Ranguna) orientalis hafniensis	Bott, 1966	Morphology-Shape
Cancer calypso	Herbst, 1801	Expeditions
Sesarma (Parasesarma) calypso	De Man, 1895	Expeditions
Alpheopsis cortesiana	Wicksten & Hendrickx, 1986	People/Scientists
Cymopolia cortezi	Crane, 1937	People/Scientists
Euryozius pagalu	Manning & Holthuis, 1981	Morphology-Shape
Bythocaris cryonesus	Bowman & Manning, 1973	Ecology/habitat
Dilocarcinus cryptodus	Ortmann, 1893	Morphology-Shape
Physachaeus ctenurus	Alcock, 1895	Morphology-Shape
Potamon cua	Yeo & Ng, 1998	Other
Phricotelphusa deharvengi	Ng, 1988	People/Scientists
Huananpotamon dehuaense	Cheng, Li, Lin, Fang, Zhang & Zhou, 2006	People/Scientists
Uca deichmanni	Rathbun, 1935	Geography
Palaemon delaserii	Hope, 1851	Geography
Decaphyllus deliquus	Komai & Rahayu, 2013	Morphology-Shape
Thor dicaprio	Anker & Baeza, 2021	Culture/Modern
Cancer diogenes	Linnaeus, 1758	People/Other
Cambarus diogenes	Girard, 1852	People/Other
Cymonomus diogenes	Ahyong & Ng, 2009	People/Other
Caridina edulis	Bouvier, 1904	People/Other
Cancer panope	Herbst, 1801	People/Scientists
Pontophilus opici	Crosnier, 1971	Morphology-Shape
Malagasya elvisi	Cumberlidge, Soma, Leever & Daniels, 2020	Culture/Modern
Dilocarcinus (Dilocarcinus) pagei cristatus	Bott, 1969	People/Scientists
Rudisullianassa pandan	Poore, 2023	Morphology-Shape
Leucosia ocellata	Bell, 1855	Geography
Catapagurus oculocrassus	McLaughlin, 1997	Morphology-Shape
Aegla parana	Schmitt, 1942	Geography
Macrobrachium occidentale	Holthuis, 1950	Geography
Steiracrangon orientalis var. brevicauda	Czerniavsky, 1884	Other
Austropotamobius pallipes bispinosus	Karaman, 1961	Geography
Bernhardus obesi-carpus	Dana, 1852	Geography
Nothocaris ocellus	Spence Bate, 1888	Geography
Actinimenes koyas	Paramasivam, Dhinakaran, Ajith Kumar & Lal, 2022	Culture/Modern
Galathea lingadua	Macpherson & Robainas-Barcia, 2015	Culture/Modern
Pisidia Linnæana	Leach, 1821	People/Scientists
Astacus pallipes var. fulcisiana	Ninni, 1886	Geography
Penaeus palmensis	Haswell, 1879	Morphology-Shape
Periclimenaeus manihinei	Bruce, 1976	People/Scientists
Paralbunea manihinei	Serène, 1977	People/Scientists
Neocaridina palmata luodianica	Liang, 2004	Geography
Astacus pallipes var. trentinicus	Albrecht, 1982	Geography
Steiracrangon orientalis var. longicauda	Czerniavsky, 1884	Geography
Macrobrachium palaemonoides	Holthuis, 1950	People/Other
Palaemon (Macrobrachium) oenone	De Man, 1902	Geography
Caridina pareparensis	De Man, 1892	Morphology-Shape
Aeglea Odebrechtii	Müller, 1876	Geography
Thelphusa Philippina	von Martens, 1868	People/Scientists
Synalpheus paraneomeris var. praedabunda	De Man, 1909	People/Scientists
Synalpheus paraneomeris var. praslini	Coutière, 1921	Morphology-Shape
Procambarus (Austrocambarus) oaxacae oaxacae	Hobbs, 1973	People/Scientists
Galathea omanensis	Tirmizi & Javed, 1993	Geography
Synalpheus paraneomeris var. prolatus	De Man, 1911	Geography
Galathea tagaro	Macpherson & Robainas-Barcia, 2015	Culture/Modern
Panopeus ovatus	Benedict & Rathbun, 1891	Morphology-Shape
Stylodactylus orientalis	Spence Bate, 1888	Geography
Pseudograpsus pallipes	H. Milne Edwards, 1837	Geography
Atyaephyra valentina	Ferrer Galdiano, 1924	People/Scientists
Galathea waiora	Macpherson & Robainas-Barcia, 2015	Culture/Modern
Corystes (Oeidea) 20-spinosa	De Haan, 1835	Morphology-Shape
Ebalia 4-dentata	Gray, 1831	Morphology-Shape
Maja (Acanthonyx) 4-dentatus	Krauss, 1843	Morphology-Shape
Cancer (Xantho) 5-dentatus	Krauss, 1843	Morphology-Shape
Corystes (Dicera) 8-dentata	De Haan, 1833	Morphology-Shape
Amarinus abatan	Naruse, Mendoza & Ng, 2008	Geography
Sicyonia abathophila	Crosnier, 2003	Ecology/habitat
Palaemon abbotii	White, 1847	People/Scientists
Hypocoelus abbotti	Rathbun, 1894	People/Scientists
Potamon abbotti	Rathbun, 1898	People/Scientists
Pinnixa abbotti	Glassell, 1935	People/Scientists
Nursia abbreviata	Bell, 1855	Morphology-Shape
Ethusa abbreviata	Castro, 2005	Morphology-Shape
Acanthopus abbreviatus	Dana, 1851	Morphology-Shape
Panopeus abbreviatus	Stimpson, 1860	Morphology-Shape
Corystoides abbreviatus	A. Milne-Edwards, 1880	Morphology-Shape
Galathodes abbreviatus	A. Milne-Edwards, 1880	Morphology-Shape
Paguristes abbreviatus	Dechancé, 1963	Morphology-Shape
Macrophthalmus abbreviatus	Manning & Holthuis, 1981	Morphology-Shape
Pagurus abditus	Lemaitre, Felder & Poupin, 2017	Other
Callianassa abdominalis	White, 1847	Morphology-Shape
Elasmonotus abdominalis	A. Milne-Edwards, 1880	Morphology-Shape
Ebalia abdominalis	Nobili, 1906	Morphology-Shape
Uroptychus abdominalis	Baba, 2018	Morphology-Shape
Paracrangon abei	Kubo, 1937	People/Scientists
Coralaxius abelei	Kensley & Gore, 1981	People/Scientists
Atya abelei	Felgenhauer & Martin, 1983	People/Scientists
Hemisphaerodromia abellana	Barnard, 1954	Morphology-Shape
Munida abelloi	Macpherson, 1994	People/Scientists
Sesarma abeokuta	Schubart & Santl, 2014	Geography
Macrophthalmus abercrombiei	Barnes, 1966	Geography
Lysmata aberrans	Czerniavsky, 1884	Morphology-Shape
Porcellanides longimana var. aberrans	Czerniavsky, 1884	Morphology-Shape
Palaemonella aberrans	Nobili, 1904	Morphology-Shape
Calocaris aberrans	Bouvier, 1905	Morphology-Shape
Chlorodopsis aberrans	Rathbun, 1906	Morphology-Shape
Cryptocnemus aberrans	Balss, 1938	Morphology-Shape
Troglocaris schmidti ablaskiri	Birstein, 1939	Culture/Past
Caridina ablepsia	Guo, Jiang & Zhang, 1992	Morphology-Shape
Procambarus ablusus	Penn, 1963	Other
Potamon (Potamiscus) aborense	Kemp, 1913	Geography
Macrobrachium abrahami	Pillai, Unnikrishnan & Suresh Kumar, 2014	People/Scientists
Michelea abranchiata	Poore, 1997	Morphology-Shape
Dromidiopsis abrolhensis	Montgomery, 1931	Geography
Actaea depressa var. abrolhensis	Montgomery, 1931	Geography
Elamena abrolhensis	Gordon, 1940	Geography
Calcinus abrolhensis	Morgan, 1988	Geography
Munida abrolhos	McCallum, Ahyong & Andreakis, 2021	Geography
Aegla abrupta	Marçal & Teixeira <i>in</i> Marçal, Páez, Da Silva, Souza-Shibatta & Teixeira, 2021	Morphology-Shape
Aeglea abtao	Schmitt, 1942	Geography
Heterocarpus abulbus	Yang, Chan & Chu, 2010	Morphology-Shape
Menaethiops abumusa	Naderloo, 2015	Geography
Alpheus abumusa	Dehghani, Sari & Naderloo, 2019	Geography
Neptunus (Lupocycloporus) aburatsubo	Balss, 1922	Other
Lipkecallianassa abyssa	Sakai, 2002	Ecology/habitat
Galatheacaris abyssalis	Vereshchaka, 1997	Ecology/habitat
Ambiaxius abyssalis	Marin, 2022	Ecology/habitat
Pontophilus abyssi	Smith, 1884	Ecology/habitat
Ethusina abyssicola	Smith, 1884	Ecology/habitat
Pseudorhombila (Pilumnoplax) abyssicola	Miers <i>in</i> Tizard, Moseley, Buchanan & Murray, 1885	Ecology/habitat
Pinnoteres abyssicola	Alcock & Anderson, 1899	Ecology/habitat
Munidopsis abyssicola	Baba, 2005	Ecology/habitat
Acanthephyra abyssorum	Filhol, 1885	Ecology/habitat
Pagurus abyssorum	Filhol, 1885	Ecology/habitat
Parapagurus abyssorum	Henderson, 1888	Ecology/habitat
Munidopsis abyssorum	A. Milne-Edwards & Bouvier, 1897	Ecology/habitat
Crangon abyssorum	Rathbun, 1902	Ecology/habitat
Munida acacia	Ahyong, 2007	Morphology-Shape
Pagurus acadianus	Benedict, 1901	Geography
Galathea acaena	Macpherson, Rodríguez-Flores & Machordom, 2023	Morphology-Shape
Pseudothelphusa acahuizotla	Ojeda-Escoto, Villalobos & Alvarez, 2017	Geography
Munidopsis acalipha	Macpherson, 2007	Morphology-Shape
Sadayoshia acamar	Macpherson & Baba, 2012	Other
Axia acantha	A. Milne-Edwards, 1879	Morphology-Shape
Munida acantha	Macpherson, 1994	Morphology-Shape
Porcellana acanthecheles	Couch, 1838	Morphology-Shape
Potamon (Potamon) acanthicum	Kemp, 1918	Morphology-Shape
Periclimenes acanthimerus	Bruce, 2006	Morphology-Shape
Pyromaia acanthina	Lemaitre, Campos & Bermúdez, 2001	Morphology-Shape
Agaricochirus acanthinus	McLaughlin, 1982	Morphology-Shape
Synalpheus hastilicrassus var. acanthitelsoniformis	De Man, 1920	Morphology-Shape
Acanthephyra acanthitelsonis	Spence Bate, 1888	Morphology-Shape
Synalpheus acanthitelsonis	Coutière, 1905	Morphology-Shape
Nematocarcinus acanthitelsonis	Pequegnat, 1970	Morphology-Shape
Hymenodora acanthitelsonis	Wasmer, 1972	Morphology-Shape
Heteropanope acanthocarpus	Crosnier, 1967	Morphology-Shape
Athanas acanthocarpus	Miya & Miyake, 1968	Morphology-Shape
Pagurixus acanthocarpus	Komai & Okuno, 2009	Morphology-Shape
Upogebia (Upogebia) acanthochela	Sakai, 1967	Morphology-Shape
Typhlopseudothelphusa acanthochela	Hobbs, 1986	Morphology-Shape
Diogenes acanthochela	Komai, Liang & Yang, 2012	Morphology-Shape
Boninpagurus acanthocheles	Asakura & Tachikawa, 2004	Morphology-Shape
Glypturus acanthochirus	Stimpson, 1866	Morphology-Shape
Macrobrachium acanthochirus	Villalobos Figueroa, 1967	Morphology-Shape
Pseudopalicus acanthodactylus	Castro, 2000	Morphology-Shape
Catapaguroides acanthodes	Fenizia, 1935	Morphology-Shape
Eupagurus acantholepis	Stimpson, 1858	Morphology-Shape
Paraspongicola acantholepis	Komai, 2011	Morphology-Shape
Galathea acanthomera	Stimpson, 1858	Morphology-Shape
Alpheus acanthomerus	Ortmann, 1890	Morphology-Shape
Paguristes acanthomerus	Ortmann, 1892	Morphology-Shape
Pilumnoplax acanthomerus	Rathbun, 1911	Morphology-Shape
Chorinus acanthonotus	Adams & White in White, 1847	Morphology-Shape
Chorinus acanthonotus	White, 1847	Morphology-Shape
Pandalus acanthonotus	Smith, 1882	Morphology-Shape
Phrygiopilus acanthophallus	Smalley, 1970	Morphology-Shape
Thalamita acanthophallus	Chen & Yang, 2008	Morphology-Shape
Thealia acanthophora	Lucas, 1839	Morphology-Shape
Porcellana acanthophora	Lucas, 1844	Morphology-Shape
Neleus acanthophorus	Desbonne <i>in</i> Desbonne & Schramm, 1867	Morphology-Shape
Procambarus acanthophorus	Villalobos F., 1948	Morphology-Shape
Upogebia acanthops	Williams, 1986	Morphology-Shape
Hamalpheus acanthops	Bruce & Iliffe, 1991	Morphology-Shape
Dehaanius acanthopus	MacLeay, 1838	Morphology-Shape
Palaemon (Eupalaemon) acanthosoma	Nobili, 1899	Morphology-Shape
Pilumnus acanthosoma	Ng, 2000	Morphology-Shape
Callianassa acanthura	Caroli, 1946	Morphology-Shape
Upogebia (Calliadne) acanthura	Coelho, 1973	Morphology-Shape
Cambarus (Lacunicambarus) acanthura	Hobbs, 1981	Morphology-Shape
Nephropsis acanthura	Macpherson, 1990	Morphology-Shape
Palaemon acanthurus	Wiegmann, 1836	Morphology-Shape
Cancer acanthus	H. Milne Edwards, 1834	Morphology-Shape
Parabetaeus acanthus	Anker, 2015	Morphology-Shape
Orconectes leptogonopodus acares	Fitzpatrick, 1965	Morphology-Shape
Upogebia acarinicauda	Sakai, 2006	Morphology-Shape
Phylladiorhynchus acastus	Rodríguez-Flores, Macpherson & Machordom, 2021	Culture/Past
Parapenaeopsis acclivirostris	Alcock, 1905	Morphology-Shape
Crangon acclivis	Rathbun, 1902	Morphology-Shape
Parapenaeus acclivis	Rathbun, 1902	Morphology-Shape
Pilumnus acer	Rathbun, 1923	Morphology-Shape
Galathea acerata	Macpherson & Robainas-Barcia, 2015	Morphology-Colour
Hypothalassia acerba	Koh & Ng, 2000	Morphology-Shape
Portunus acerbiterminalis	Stephenson & Rees, 1967	Morphology-Shape
Abyssotheres acesticola	Komatsu & Ohtsuka, 2009	Ecology/Host
Lucifer acestra	Dana, 1852	Morphology-Shape
Mastigopus acetiformis	Spence Bate, 1888	Morphology-Shape
Leiogalathea achates	Rodríguez-Flores, Macpherson & Machordom, 2019	Culture/Past
Paramunida achernar	Cabezas, Macpherson & Machordom, 2010	Other
Caphyra acheronae	Takeda & Webber, 2006	Expeditions
Atyaephyra acheronensis	Christodoulou, Antoniou, Magoulas & Koukouras, 2012	Geography
Cambarus acherontis	Lönnberg, 1894	Culture/Past
Cambarus acherontis	Lönnberg, 1895	Culture/Past
Cherax acherontis	Patoka, Bláha & Kouba, 2017	Culture/Past
Macrobrachium acherontium	Holthuis, 1977	Culture/Past
Procambarus (Villalobosus) achilli	López, Mejía & Alvarez, 2003	Other
Hippolysmata acicula	Rathbun, 1906	Morphology-Shape
Lucifer acicularis	Dana, 1852	Morphology-Shape
Latreutes acicularis	Ortmann, 1890	Morphology-Shape
Palaemon aciculatus	White, 1847	Morphology-Shape
Paguristes aciculus	Grant, 1905	Morphology-Shape
Actaea acies	Rathbun, 1911	Morphology-Shape
Plesionika acinacifer	Chace, 1985	Morphology-Shape
Sympagurus acinops	Lemaitre, 1989	Morphology-Shape
Galathea acis	Macpherson & Robainas-Barcia, 2015	Culture/Past
Pachycheles ackleianus	A. Milne-Edwards, 1880	Geography
Agostocaris acklinsensis	Alvarez, Villalobos & Iliffe, 2004	Geography
Munida acola	Macpherson, 2009	Morphology-Size
Uroptychus acostalis	Baba, 1988	Morphology-Shape
Potamonautes (Longipotamonautes) ballayi acristatus	Bott, 1955	Morphology-Shape
Visayeres acron	Ahyong & Ng, 2007	Morphology-Shape
Sadayoshia acroporae	Baba, 1972	Ecology/Host
Sadayoshia actaea	Macpherson & Baba, 2012	Culture/Past
Maxillothrix actaeiformis	Stebbing, 1921	Other
Lophozozymus actaeoides	A. Milne-Edwards, 1867	Other
Anisopagurus actinophorus	Lemaitre & McLaughlin, 1996	Ecology/Host
Pilumnus actumnoides	A. Milne-Edwards, 1873	Other
Lebbeus acudactylus	Jensen, 2006	Morphology-Shape
Cambarus (Jugicambarus) aculabrum	Hobbs & Brown, 1987	Morphology-Shape
Nanhaipotamon aculatum	Dai, 1997	Morphology-Shape
Chorinus aculeata	H. Milne Edwards, 1834	Morphology-Shape
Pisa aculeata	Bell, 1836	Morphology-Shape
Hyas aculeata	Gibbes, 1850	Morphology-Shape
Micippe aculeata	Bianconi, 1851	Morphology-Shape
Galathea aculeata	Haswell, 1882	Morphology-Shape
Munidopsis subsquamosa var. aculeata	Henderson, 1888	Morphology-Shape
Munidopsis aculeata	A. Milne-Edwards & Bouvier, 1894	Morphology-Shape
Glyphocrangon aculeatum	A. Milne-Edwards, 1881	Morphology-Shape
Cancer aculeatus	Fabricius, 1780	Morphology-Shape
Cancer aculeatus	Herbst, 1790	Morphology-Shape
Cancer aculeatus	Fabricius, 1793	Morphology-Shape
Cancer aculeatus	Say, 1818	Morphology-Shape
Pagurus aculeatus	H. Milne Edwards, 1848	Morphology-Shape
Acanthophrys aculeatus	A. Milne-Edwards, 1865	Morphology-Shape
Nephropsis aculeatus	Smith, 1881	Morphology-Shape
Paralomis aculeatus	Henderson, 1888	Morphology-Shape
Polycheles aculeatus	Galil, 2000	Morphology-Shape
Xiphonectes aculeatus	Koch & Ďuriš, 2019	Morphology-Shape
Alpheus aculeipes	Coutière, 1905	Morphology-Shape
Leptochela aculeocaudata	Paulson, 1875	Morphology-Shape
Caridina acuminata	Stimpson, 1860	Morphology-Shape
Glyphocrangon acuminata	Spence Bate, 1888	Morphology-Shape
Munidopsis acuminata	Benedict, 1902	Morphology-Shape
Solenocera acuminata	Pérez Farfante & Bullis, 1973	Morphology-Shape
Hippolyte acuminatus	Dana, 1852	Morphology-Shape
Acheloüs acuminatus	Stimpson, 1871	Morphology-Shape
Cambarus acuminatus	Faxon, 1884	Morphology-Shape
Manuscaris acuminatus	Komai & Tsuchida, 2015	Morphology-Shape
Osachila acuta	Stimpson, 1871	Morphology-Shape
Euprognatha acuta	A. Milne-Edwards, 1880	Morphology-Shape
Eurynome aspera var. acuta	A. Milne-Edwards & Bouvier, 1900	Morphology-Shape
Parthenope acuta	Klunzinger, 1906	Morphology-Shape
Ixa acuta	Tyndale-Biscoe & RW George, 1962	Morphology-Shape
Caridina acuta	Liang, Chen & Li, 2005	Morphology-Shape
Heptacarpus acuticarinatus	Komai & Ivanov, 2008	Morphology-Shape
Caridina acuticaudata	Đăng, 1975	Morphology-Shape
Mithrax acuticornis	Stimpson, 1871	Morphology-Shape
Cheiragonus acutidens	Stimpson, 1858	Morphology-Shape
Panopaeus acutidens	Haswell, 1881	Morphology-Shape
Callinectes sapidus acutidens	Rathbun, 1896	Morphology-Shape
Myra kessleri var. acutidens	Ihle, 1918	Morphology-Shape
Trichodactylus (Valdivia) tifucanus acutidens	Pretzmann, 1968	Morphology-Shape
Neoliomera acutidens	Sakai, 1969	Morphology-Shape
Odhneria acutidens	Sakai, 1983	Morphology-Shape
Petalomera acutidens	Sakai, 1983	Morphology-Shape
Charybdis (Charybdis) acutidens	Türkay, 1986	Morphology-Shape
Philyra acutidens	Chen, 1987	Morphology-Shape
Siamthelphusa acutidens	Ng & Naiyanetr, 1997	Morphology-Shape
Pseudocoutierea acutidorsata	Olthof, Becking & Fransen, 2018	Morphology-Shape
Scyra acutifrons	Dana, 1851	Morphology-Shape
Mimulus acutifrons	A. Milne-Edwards, 1867	Morphology-Shape
Trapezia acutifrons	A. Milne-Edwards, 1867	Morphology-Shape
Pisa acutifrons	A. Milne-Edwards, 1868	Morphology-Shape
Goniosoma acutifrons	De Man, 1879	Morphology-Shape
Cymopolia acutifrons	A. Milne-Edwards, 1880	Morphology-Shape
Acanthephyra acutifrons	Spence Bate, 1888	Morphology-Shape
Eiconaxius acutifrons	Spence Bate, 1888	Morphology-Shape
Pasiphaea acutifrons	Spence Bate, 1888	Morphology-Shape
Catapaguroides acutifrons	A. Milne-Edwards & Bouvier, 1892	Morphology-Shape
Polyonyx acutifrons	De Man, 1896	Morphology-Shape
Pilumnus acutifrons	Rathbun, 1906	Morphology-Shape
Eriocheir sinensis f. acutifrons	Panning, 1938	Morphology-Shape
Caridina acutipoda	Liang, 1989	Morphology-Shape
Callianassa acutirostella	Sakai, 1988	Morphology-Shape
Pontophilus acutirostratus	Yaldwyn, 1960	Morphology-Shape
Palaemon acutirostris	Dana, 1852	Morphology-Shape
Caridina acutirostris	Schenkel, 1902	Morphology-Shape
Processa acutirostris	Nouvel & Holthuis, 1957	Morphology-Shape
Calaxius acutirostris	Sakai & de Saint Laurent, 1989	Morphology-Shape
Munidopsis acutispina	Benedict, 1902	Morphology-Shape
Homola (Moloha) acutispina	Sakai, 1961	Morphology-Shape
Upogebia acutispina	de Saint Laurent & Ngoc-Ho, 1979	Morphology-Shape
Calappa acutispina	Lai, Chan & Ng, 2006	Morphology-Shape
Cambarus acutissimus	Girard, 1852	Morphology-Shape
Alpheus acutocarinatus	De Man, 1909	Morphology-Shape
Alpheus acutofemoratus	Dana, 1852	Morphology-Shape
Goniosoma acutum	A. Milne-Edwards, 1869	Morphology-Shape
Sinopotamon acutum	Dai, 1997	Morphology-Shape
Cambarus acutus	Girard, 1852	Morphology-Shape
Virbius acutus	Stimpson, 1860	Morphology-Shape
Galathodes acutus	A. Milne-Edwards, 1881	Morphology-Shape
Anapagurus acutus	A. Milne-Edwards & Bouvier, 1893	Morphology-Shape
Caricyphus acutus	Coutière, 1905	Morphology-Shape
Pylopagurus acutus	Forest & de Saint Laurent, 1968	Morphology-Shape
Parapagurus acutus	de Saint Laurent, 1972	Morphology-Shape
Parapagurus acutus acutus	de Saint Laurent, 1972	Morphology-Shape
Metaxanthops acutus	Serène, 1984	Morphology-Shape
Hippa adactyla	Fabricius, 1787	Morphology-Shape
Callianassa adamas	Kensley, 1974	Geography
Alpheus adamastor	Coutière, 1908	Morphology-Size
Zebrida adamsii	White, 1847	People/Scientists
Philyra adamsii	Bell, 1855	People/Scientists
Batodaeus adanad	Vázquez-Bader & Gracia, 2004	People/Other
Rodriguezia adani	Alvarez & JL Villalobos, 2018	People/Scientists
Procambarus adani	Álvarez, Torres & Villalobos, 2021	People/Scientists
Sadayoshia adaro	Macpherson & Baba, 2012	Culture/Past
Odontozona addaia	Pretus, 1990	Geography
Crosnierita adela	Ahyong, Taylor & McCallum, 2013	Other
Potamonautes (Lirrangapotamonautes) lirrangensis adeleae	Bott, 1968	People/Other
Porcellanopagurus adelocercus	McLaughlin & Hogarth, 1998	Morphology-Shape
Carcinoplax adelphia	Ng & Castro, 2020	Other
Macromedaeus adelus	Mendoza, 2021	Other
Plesionika adenensis	Timofeev, 1993	Geography
Bathypalaemonella adenensis	Cleva, 2001	Geography
Parapandalus Adensameri	Balss, 1914	People/Scientists
Potamonautes (Longipotamonautes) ballayi adentatus	Bott, 1955	Morphology-Shape
Uroptychus adiastaltus	Baba, 2018	Morphology-Shape
Potamon (Geotelphusa) adiatretum	Alcock, 1909	Morphology-Shape
Menippe adina	Williams & Felder, 1986	Morphology-Shape
Terrathelphusa adipis	Ng & Wowor, 1990	Morphology-Shape
Cancer admete	Herbst, 1803	Culture/Past
Remipes admirabilis	Thallwitz, 1891	Other
Uroptychus adnatus	Baba, 2018	Morphology-Shape
Mahatha adonis	Ng & Tay, 2001	Culture/Past
Fredius adpressus	Rodríguez & Pereira, 1992	Morphology-Shape
Calliaxis adriatica	Heller, 1862	Geography
Palaemon adriaticus	O.G. Costa & A. Costa, 1871	Geography
Anapagurus adriaticus	García-Gómez, 1994	Geography
Cancer adscensionis	Osbeck, 1765	Geography
Macrobrachium adscitum	Riek, 1951	Other
Macrobrachium adscitum adscitum	Riek, 1951	Other
Penaeus adspersus	Tilesius, 1819	Morphology-Colour
Palaemon adspersus	Rathke, 1836	Morphology-Colour
Periclimenes adularans	Bruce, 2003	Geography
Sicyonia adunca	Crosnier, 2003	Morphology-Shape
Doclea aduncus	HP Wagner, 1986	Morphology-Shape
Salmoneus aduncus	Komai, 2022	Morphology-Shape
Lauriea adusta	Macpherson & Robainas-Barcia, 2013	Morphology-Colour
Cambarus (Jugicambarus) adustus	Thoma, Fetzner, Stocker & Loughman, 2016	Morphology-Colour
Astacus advena	Le Conte, 1855	Other
Brachycarpus advena	Nobili, 1906	Other
Paratya atacta adynata	Riek, 1953	Other
Paratelphusa (Phricotelphusa) aedes	Kemp, 1923	Morphology-Shape
Geosesarma aedituens	Naruse & Jaafar, 2009	Ecology/habitat
Cancer aegagropila	Fabricius, 1787	Morphology-Colour
Dromidia aegibotus	Barnard, 1947	Morphology-Shape
Periclimenes aegylios	Grippa & d'Udekem d'Acoz, 1996	Geography
Periclimenes sagittifer aegylios	Grippa & d'Udekem d'Acoz, 1996	Geography
Metapenaeopsis aegyptia	Galil & Golani, 1990	Geography
Galathea aegyptiaca	Paulson, 1875	Geography
Caridina africana f. aegyptiaca	Bouvier, 1925	Geography
Aretopsis aegyptiaca	Ramadan, 1936	Geography
Petrolisthes aegyptiacus	Werding & Hiller, 2007	Geography
Palaemon (Parapalaemon) aemulus	Nobili, 1906	Other
Leiogalathea aeneas	Rodríguez-Flores, Macpherson & Machordom, 2019	Culture/Past
Cancer aeneus	Linnaeus, 1758	Culture/Past
Ankerius aenigmaticus	Ng, Rahayu & Shih, 2016	Other
Pagurus aequabilis	Dana, 1851	Other
Agononida aequabilis	Macpherson, 2006	Other
Torbenella aequabilis	Macpherson, Rodríguez-Flores & Machordom, 2023	Other
Alpheus aequalis	Kingsley, 1878	Morphology-Shape
Alpheopsis aequalis	Coutière, 1897	Morphology-Shape
Anapagrides aequalis	Komai, 1999	Morphology-Shape
Munida aequalis	Ahyong & Poore, 2004	Morphology-Shape
Galathea aequata	Macpherson & Robainas-Barcia, 2015	Other
Palaemon appuni var. aequatorialis	Ortmann, 1891	Geography
Potamocarcinus aequatorialis	Ortmann, 1897	Geography
Cymonomus aequilonius	Dell, 1971	Geography
Nika aequimana	Paulson, 1875	Morphology-Shape
Callianassa (Callichirus) aequimana	Baker, 1907	Morphology-Shape
Callianassa aequimana	Baker, 1907	Morphology-Shape
Bernhardus aequimanus	Dana, 1852	Morphology-Shape
Betaeus aequimanus	Dana, 1852	Morphology-Shape
Scyllarus aequinoctialis	Lund, 1793	Morphology-Shape
Potamocarcinus (Potamocarcinus) nicaraguensis aequipinosus	Pretzmann, 1971	Morphology-Shape
Trapezionida aequispina	Tiwari, Padate & Cubelio, 2023	Morphology-Shape
Lithodes aequispinus	Benedict, 1895	Morphology-Shape
Alpheus aequus	Kim & Abele, 1988	Morphology-Shape
Pasiphaea aequus	Komai, Lin & Chan, 2012	Morphology-Shape
Anchistia aesopia	Spence Bate, 1864	Culture/Past
Scyllarus aesopius	Holthuis, 1960	Culture/Past
Upogebia aestuari	Williams, 1993	Ecology/habitat
Pilumnus aestuarii	Nardo, 1847	Ecology/habitat
Carcinus moenas var. aestuarii	Nardo, 1847	Ecology/habitat
Carcinus maenas var. aestuarii	Nardo, 1847	Ecology/habitat
Ibanum aethes	Ng, 1995	Other
Axiopsis aethiopica	Nobili, 1904	Geography
Cancer afata	Curtiss, 1938	Other
Halicarcinus afecundus	Lucas, 1981	Other
Aegeon affine	Alcock, 1901	Other
Astacus affinis	Say, 1817	Other
Gebia affinis	Say, 1818	Other
Dorippe affinis	Desmarest, 1823	Other
Gelasimus affinis	Guérin, 1829	Other
Porcellana affinis	Gray, 1831	Other
Phyllosoma affinis	Guérin, 1833	Other
Cancer (Xantho) affinis	De Haan, 1835	Other
Porcellana affinis	Guérin, 1835	Other
Pagurus affinis	H. Milne Edwards, 1836	Other
Grapsus (Pachysoma) affinis	De Haan, 1837	Other
Palaemon affinis	H. Milne Edwards, 1837	Other
Palemon affinis	H. Milne Edwards, 1837	Other
Penaeus affinis	H. Milne Edwards, 1837	Other
Macrophthalmus affinis	Guérin-Méneville, 1838	Other
Maja (Dione) affinis	De Haan, 1839	Other
Hippolite affinis	Owen, 1839	Other
Inachus affinis	Rizza, 1839	Other
Palaemon affinis	O.G. Costa & A. Costa, 1840	Other
Libinia affinis	Randall, 1840	Other
Myra affinis	White, 1847	Other
Crangon affinis	De Haan, 1849	Other
Hemigrapsus affinis	Dana, 1851	Other
Palaemon affinis	Hope, 1851	Other
Actaeodes affinis	Dana, 1852	Other
Charybdis affinis	Dana, 1852	Other
Acanthopus affinis	H. Milne Edwards, 1853	Other
Ostracotheres affinis	H. Milne Edwards, 1853	Other
Alpheus affinis	Guise, 1854	Other
Leucosia affinis	Bell, 1855	Other
Myra affinis	Bell, 1855	Other
Epialtus affinis	Stimpson, 1859	Other
Cancer affinis	Desbonne <i>in</i> Desbonne & Schramm, 1867	Other
Mithrax affinis	Desbonne <i>in</i> Desbonne & Schramm, 1867	Other
Mithrax affinis	de Brito Capello, 1871	Other
Lambrus affinis	A. Milne-Edwards, 1872	Other
Pilumnus affinis	de Brito Capello, 1875	Other
Panopeus affinis	Streets & Kingsley, 1877	Other
Alpheus affinis	Kingsley, 1878	Other
Paramicippe affinis	Miers, 1879	Other
Trichocarcinus affinis	Miers, 1879	Other
Munida affinis	A. Milne-Edwards, 1880	Other
Coenobita perlatus var. affinis	Miers, 1880	Other
Eucrate affinis	Haswell, 1881	Other
Ebalia affinis	Miers, 1881	Other
Achaeus affinis	Miers, 1884	Other
Axius affinis	De Man, 1888	Other
Parapagurus affinis	Henderson, 1888	Other
Galathea affinis	Ortmann, 1892	Other
Achelous affinis	Faxon, 1893	Other
Heterocarpus affinis	Faxon, 1893	Other
Sicyonia affinis	Faxon, 1893	Other
Pylopagurus affinis	Faxon, 1893	Other
Diogenes affinis	Henderson, 1893	Other
Geryon affinis	A. Milne-Edwards & Bouvier, 1894	Other
Palaemonella affinis	Zehntner, 1894	Other
Pinnotheres affinis	Bürger, 1895	Other
Ptychognathus affinis	De Man, 1895	Other
Acanthephyra affinis	Faxon, 1896	Other
Pinnixa affinis	Rathbun, 1898	Other
Pseudothelphusa affinis	Rathbun, 1898	Other
Palicus affinis	A. Milne-Edwards & Bouvier, 1899	Other
Plesionika affinis	Alcock & Anderson, 1899	Other
Dotilla affinis	Alcock, 1900	Other
Parapinnixa affinis	Holmes, 1900	Other
Callianassa affinis	Holmes, 1900	Other
Pasiphaea affinis	Rathbun, 1902	Other
Haliporus affinis	Bouvier, 1906	Other
Engaeus affinis	Smith & Schuster, 1913	Other
Heterocarpus affinis	Borradaile, 1915	Other
Lucifer affinis	Borradaile, 1915	Other
Lysmata affinis	Borradaile, 1915	Other
Thalassocaris affinis	Borradaile, 1915	Other
Periclimenes (Falciger) affinis	Borradaile, 1915	Other
Paramithrax (Leptomithrax) affinis	Borradaile, 1916	Other
Litocheira affinis	Tesch, 1918	Other
Sergestes affinis	Hansen, 1919	Other
Cerataspis affinis	Kishinouye, 1926	Other
Gebia affinis	Yokoya, 1930	Other
Pantomus affinis	Chace, 1937	Other
Chirostylus affinis	Chace, 1942	Other
Aegla affinis	Schmitt, 1942	Other
Neostylodactylus affinis	Hayashi & Miyake, 1968	Other
Processa affinis	Hayashi, 1975	Other
Callinectes affinis	Fausto-Filho, 1980	Other
Parathelphusa (Parathelphusa) blanfordi afghaniensis	Pretzmann, 1963	Geography
Isolapotamon aflagellum	Dai, Song, Li & Liang, 1980	Morphology-Shape
Neocallianopsis africana	Sakai, Türkay, Beuck & Freiwald, 2015	Geography
Sesarma africana	H. Milne Edwards, 1837	Geography
Thelphusa africana	A. Milne-Edwards, 1869	Geography
Ocypode africana	De Man, 1881	Geography
Thalamita integra var. africana	Miers, 1881	Geography
Caridina africana	Kingsley, 1883	Geography
Sesarma erythodactyla var. africana	Ortmann, 1894	Geography
Gebia africana	Ortmann, 1894	Geography
Heteropanope africana	De Man, 1902	Geography
Atya africana	Bouvier, 1904	Geography
Munidopsis africana	Balss, 1913	Geography
Munida africana	Balss, 1913	Geography
Munidopsis (Munidopsis) stylirostris var. africana	Doflein & Balss, 1913	Geography
Trachypenaeus constrictus var. africana	Balss, 1916	Geography
Alpheus floridanus var. africana	Balss, 1916	Geography
Charybdis (Gonioneptunus) africana	Shen, 1935	Geography
Porcellana platycheles africana	Chace, 1956	Geography
Domecia acanthophora f. africana	Guinot, 1964	Geography
Domecia acanthophora africana	Holthuis, Edwards & Lubbock, 1980	Geography
Sakaila africana	Manning & Holthuis, 1981	Geography
Paralomis africana	Macpherson, 1982	Geography
Maja africana	Griffin & Tranter, 1986	Geography
Mursia africana	Galil, 1993	Geography
Calappa africana	Lai & Ng, 2006	Geography
Glyphocrangon africana	Komai, 2010	Geography
Camatopsis africana	Ng & Castro, 2016	Geography
Macrobrachium africanum	Spence Bate, 1868	Geography
Neosarmatium africanum	Ragionieri, Fratini & Schubart, 2012	Geography
Platyonychus africanus	A. Milne-Edwards, 1861	Geography
Panopeus africanus	A. Milne-Edwards, 1867	Geography
Pilumnus africanus	A. Milne-Edwards, 1867	Geography
Callinectes diacanthus var. africanus	A. Milne-Edwards, 1879	Geography
Palaemon africanus	Kingsley, 1883	Geography
Clibanarius africanus	Aurivillus, 1898	Geography
Hymenopenaeus debilis var. africanus	Bouvier, 1908	Geography
Calocarcinus africanus	Calman, 1909	Geography
Parapenaeus africanus	Balss, 1913	Geography
Palaemonetes africanus	Balss, 1916	Geography
Solenocera africanus	Stebbing, 1917	Geography
Parahexapus africanus	Balss, 1922	Geography
Acanthocarpus africanus	Capart, 1951	Geography
Alpheopsis africanus	Holthuis, 1952	Geography
Medaeus africanus	Monod, 1956	Geography
Synalpheus hululensis africanus	Crosnier & Forest, 1965	Geography
Parapagurus africanus	de Saint Laurent, 1972	Geography
Nematocarcinus africanus	Crosnier & Forest, 1973	Geography
Nepinnotheres africanus	Manning, 1993	Geography
Lebbeus africanus	Fransen, 1997	Geography
Periclimenes africanus	Fransen & Wirtz, 2023	Geography
Agononida africerta	Poore & Andreakis, 2012	Geography
Parathelphusa (Barythelphusa) Afzelii	Colosi, 1924	People/Scientists
Periclimenes (Ancylocaris) agag	Kemp, 1922	Culture/Past
Luciades agana	Kropp & Manning, 1996	Geography
Manaxius aganaensis	Sakai, 2011	Geography
Randallia agaricias	Rathbun, 1898	Morphology-Shape
Pariphiculus agariciferus	Ihle, 1918	Morphology-Shape
Cymopolus Agassirii	A. Milne-Edwards & Bouvier, 1899	People/Scientists
Pylocheles agassizi	A. Milne-Edwards, 1880	People/Scientists
Leptodius agassizi	A. Milne-Edwards, 1880	People/Scientists
Sphenocarcinus agassizi	Rathbun, 1894	People/Scientists
Palicus agassizi	A. Milne-Edwards & Bouvier, 1899	People/Scientists
Coralliocaris agassizi	Coutière, 1901	People/Scientists
Halimus agassizi	Rathbun, 1902	People/Scientists
Eiconaxius agassizi	Bouvier, 1905	People/Scientists
Potamon (Geothelphusa) agassizi	Rathbun, 1905	People/Scientists
Eryoneicus Agassizi	Bouvier, 1917	People/Scientists
Callianassa agassizi	Biffar, 1971	People/Scientists
Heterocarpus agassizi	Allen & Butler, 1994	People/Scientists
Pilumnus agassizii	Stimpson, 1871	People/Scientists
Cyclodorippe agassizii	A. Milne-Edwards, 1880	People/Scientists
Eucratodes agassizii	A. Milne-Edwards, 1880	People/Scientists
Nephropsis agassizii	A. Milne-Edwards, 1880	People/Scientists
Ozius agassizii	A. Milne-Edwards, 1880	People/Scientists
Pentacheles Agassizii	A. Milne-Edwards, 1880	People/Scientists
Galathea agassizii	A. Milne-Edwards, 1880	People/Scientists
Amathia agassizii	SI Smith, 1882	People/Scientists
Miersia agassizii	Smith, 1882	People/Scientists
Rhachocaris agassizii	Smith, 1882	People/Scientists
Cheraphilus agassizii	Smith, 1882	People/Scientists
Lithodes agassizii	Smith, 1882	People/Scientists
Munidopsis agassizii	Faxon, 1893	People/Scientists
Nematocarcinus agassizii	Faxon, 1893	People/Scientists
Petrolisthes agassizii	Faxon, 1893	People/Scientists
Solenocera agassizii	Faxon, 1893	People/Scientists
Parastacus agassizii	Faxon, 1898	People/Scientists
Pseudothelphusa agassizii	Rathbun, 1898	People/Scientists
Penaeopsis agassizii	Bouvier, 1905	People/Scientists
Acanthephyra agassizzi	Smith, 1884	People/Scientists
Periclimenella agattii	Bharati, Purushothaman, Akash, Jose, Madhavan, Dhinakaran, Saravanane, Ajith Kumar & Kumar Lal, 2019	Geography
Munida agave	Macpherson & Baba, 1993	Culture/Past
Synalpheus agelas	Pequegnat & Heard, 1979	Ecology/Host
Ebalia agglomus	Barnard, 1955	Other
Hydrothelphusa agilis	A. Milne-Edwards, 1872	Ecology/Behaviour
Alpheus agilis	Anker, Hurt & Knowlton, 2009	Ecology/Behaviour
Terrathelphusa aglaia	Grinang & Ng, 2015	Morphology-Colour
Alpheus aglaopheniae	Borradaile, 1900	Ecology/habitat
Siderochinia aglaos	Lee, Richer de Forges & Ng, 2021	Other
Lithadia sculpta var. aglypha	Laurie, 1906	Morphology-Shape
Pontophilus aglyptus	Crosnier, 1971	Morphology-Shape
Ovitamon agmamba	Husana, Kase & Ng, 2013	Geography
Lambrus agonus	Stimpson, 1871	Morphology-Shape
Pseudothelphusa agrestis	Rathbun, 1898	Geography
Gecarcinus agricola	Reichenbach, 1828	Ecology/habitat
Potamon (Centropotamon) hueceste hueceste natio agris	Pretzmann, 1983	Other
Alpheus agrogon	Ramos, 1997	Geography
Uroptychus aguayoi	Chace, 1939	People/Scientists
Inachus aguiarii	de Brito Capello, 1876	People/Other
Merhippolyte agulhasensis	Spence Bate, 1888	Geography
Paguristes agulhasensis	Forest, 1954	Geography
Macrobrachium agwi	Klotz, 2008	Other
Indochinamon ahkense	Naruse, Chia & Zhou, 2018	Geography
Tomopaguropsis ahkinpechensis	Lemaitre, Vázquez-Bader & Gracia, 2014	Geography
Macrobrachium ahkowi	Chong & Khoo, 1987	People/Scientists
Camptoplax ahmar	Ng & Anker, 2024	Geography
Rochinia ahyongi	McLay, 2009	People/Scientists
Athanas ahyongi	Anker & Komai, 2010	People/Scientists
Galathea ahyongi	Macpherson & Robainas-Barcia, 2015	People/Scientists
Lithodes ahyongi	Takeda, 2018	People/Scientists
Uroptychus ahyongi	Schnabel, 2020	People/Scientists
Munidopsis ahyongi	Dong & Li, 2021	People/Scientists
Pinnixa aidae	Righi, 1967	People/Other
Parapleisticantha aie	Ng, Richer de Forges & Lee, 2023	Morphology-Colour
Thomassinia aimsae	Poore, 1997	Other
Terrapotamon aipooae	Ng, 1986	People/Other
Latopilumnus ajmali	Ng, Prema & Ravichandran, 2024	People/Scientists
Megokris akademik	Shinomiya & Sakai, 2006	Expeditions
Paramunida akaina	Cabezas & Chan, 2014	Morphology-Shape
Achaeus akanensis	Sakai, 1938	Geography
Parapenaeus akayebi	Rathbun, 1902	Other
Alainodaeus akiaki	Davie, 1993	Geography
Bythocaris akidopleura	Fransen, 1993	Morphology-Shape
Periclimenes (Ancylocaris) akiensis	Kubo, 1936	Geography
Triacanthoneus akumalensis	Alvarez, Iliffe, Gonzalez & Villalobos, 2012	Geography
Rajathelphusa ala	Raj, Kumar & Ng, 2021	Ecology/habitat
Palaemonias alabamae	Smalley, 1961	Geography
Cambarus alabamensis	Faxon, 1884	Geography
Aegla alacalufi	Jara & López, 1981	People/Other
Cambarus lucifugus alachua	Hobbs, 1940	Geography
Triacanthoneus alacranes	Anker, 2010	Geography
Alpheus alaincrosnieri	Anker, 2020	People/Scientists
Upogebia (Neogebicula) alaini	Sakai, 1982	People/Scientists
Plesionika alaini	Burukovsky, 1993	People/Scientists
Onconida alaini	Baba & de Saint Laurent, 1996	People/Scientists
Pagurus alaini	Komai, 1998	People/Scientists
Oxypleurodon alaini	Richer de Forges & Ng, 2009	People/Scientists
Gordonopsis alaini	Ng & Richer de Forges, 2020	People/Scientists
Oreotlos alaini	Galil & Ng, 2023	People/Scientists
Eurycassiope alaini	Mendoza, 2023	People/Scientists
Soceulia alainia	Galil, 2006	People/Scientists
Crosnautes alainus	Cumberlidge, Soma, Leever, Clark & Daniels, 2021	People/Scientists
Munidopsis alaminos	Pequegnat & Pequegnat, 1970	Expeditions
Parapagurus alaminos	Lemaitre, 1986	Expeditions
Tethisea alanwilliamsi	Poore & Collins, 2015	People/Scientists
Typhlonida alaos	Macpherson, Rodríguez-Flores & Machordom, 2023	Morphology-Shape
Pagurus alarius	Lemaitre, 2020	Morphology-Shape
Crangon alaskensis	Lockington, 1877	Geography
Nectocrangon alaskensis	Kingsley, 1883	Geography
Eupagurus (Eupagurus) alaskensis	Benedict, 1892	Geography
Allopontonia alastairi	Bruce, 2010	People/Other
Caphyra alata	Richters, 1880	Morphology-Shape
Glyphocrangon alata	Faxon, 1893	Morphology-Shape
Sclerocrangon alata	Rathbun, 1902	Morphology-Shape
Calappa alata	Rathbun, 1911	Morphology-Shape
Hypolobocera alata	Campos, 1989	Morphology-Shape
Nursia alata	Komatsu & Takeda, 1999	Morphology-Shape
Pagurus alatus	Fabricius, 1775	Morphology-Shape
Austinograea alayseae	Guinot, 1990	People/Scientists
Ethusa alba	Filhol, 1884	Morphology-Colour
Crangon alba	Holmes, 1900	Morphology-Colour
Holthuisana alba	Holthuis, 1980	Morphology-Colour
Caridina alba	Li & Li, 2010	Morphology-Colour
Munida alba	Liu, Li & Lin, 2020	Morphology-Colour
Prismatopus albanyensis	Ward, 1933	Geography
Crangon albatrossae	Banner, 1953	Expeditions
Munidopsis albatrossae	Pequegnat & Pequegnat, 1973	Expeditions
Galathea albatrossae	Baba, 1988	Expeditions
Uroptychus albatrossae	Baba, 1988	Expeditions
Periclimenes albatrossae	Chace & Bruce, 1993	Expeditions
Eiconaxius albatrossae	Kensley, 1996	Expeditions
Laurentia albatrossae	McLaughlin & Haig, 1996	Expeditions
Rhynchocinetes albatrossae	Chace, 1997	Expeditions
Hemipagurus albatrossae	Asakura, 2001	Expeditions
Glyphocrangon albatrossae	Komai, 2004	Expeditions
Synalpheus albatrossi	Coutière, 1909	Expeditions
Trizocheles albatrossi	Forest, 1987	Expeditions
Ciliopagurus albatrossi	Forest, 1995	Expeditions
Acanthocyclus albatrossis	Rathbun, 1898	Expeditions
Procambarus (Ortmannicus) albaughi	Johnson, 2018	People/Scientists
Gebiacantha albengai	Ngoc-Ho, 2005	People/Scientists
Calcinus albengai	Poupin & Lemaitre, 2003	People/Scientists
Alpheus albertei	Kazmi & Kazmi, 1979	People/Scientists
Limnocaridina alberti	Lenz, 1910	Geography
Astaconephrops Albertisii	Nobili, 1899	People/Scientists
Astacus albescens	Pennant, 1812	Morphology-Colour
Munida albiapicula	Baba & Yu, 1987	Morphology-Colour
Calappa albicans	Bosc, 1801	Morphology-Colour
Ocypode albicans	Bosc, 1801	Morphology-Colour
Clibanarius albicinctus	Alcock, 1905	Morphology-Colour
Trachypenaeus albicomus	Hayashi & Toriyama, 1980	Morphology-Colour
Pagurus albidianthus	de Saint Laurent & McLaughlin <i>in</i> Forest, de Saint Laurent, McLaughlin & Lemaitre, 2000	Morphology-Colour
Eurytium albidigitum	Rathbun, 1933	Morphology-Colour
Clibanarius albidigitus	Nobili, 1901	Morphology-Colour
Cherax albidus	Clark, 1936	Morphology-Colour
Panulirus albiflagellum	Chan & Chu, 1996	Morphology-Colour
Pseudophilyra albimaculata	Chen & Sun, 2002	Morphology-Colour
Paguristes albimaculatus	Komai, 2001	Morphology-Colour
Philarius albimaculatus	Marin & Anker, 2011	Morphology-Colour
Diogenes albimanus	Landschoff & Rahayu, 2018	Morphology-Colour
Trizocheles albipes	Komai, 2013	Morphology-Colour
Plesionika albocristata	Chan & Chuang, 2002	Morphology-Colour
Geothelphusa albogilva	Shy, Ng & Yu, 1994	Morphology-Colour
Harrovia albo-lineata	Adams & White, 1849	Morphology-Colour
Carpilodes albolineatus	Serène & VL Nguyen, 1961	Morphology-Colour
Periclimenes albolineatus	Bruce & Coombes, 1997	Morphology-Colour
Grapse albo-lineatus	Latreille in Milbert, 1812	Morphology-Colour
Geosesarma albomita	Yeo & Ng, 1999	Morphology-Colour
Laomenes albonigrus	Bruce, 2014	Morphology-Colour
Pagurus albopunctatus	Latreille in Milbert, 1812	Morphology-Colour
Anapagurus alboranensis	García-Gómez, 1994	Geography
Cancer Mytulorum albus	Baster, 1765	Morphology-Colour
Cancer mytilorum albus	Herbst, 1783	Morphology-Colour
Pseudograpsus albus	Stimpson, 1858	Morphology-Colour
Eupagurus (Eupagurus) albus	Benedict, 1892	Morphology-Colour
Etisodes albus	Ward, 1935	Morphology-Colour
Chaceon albus	Davie, Ng & Dawson, 2007	Morphology-Colour
Uroptychus albus	McCallum & Poore, 2013	Morphology-Colour
Lacunipotamon albusorbitum	Dai, Song, He, Cao, Xu & Zhong, 1975	Morphology-Colour
Demania alcalai	Garth, 1975	People/Scientists
Oreophorus reticulatus var. alcicornis	Alcock, 1896	Morphology-Shape
Remipes alcimede	De Man, 1902	Culture/Past
Spirontocaris alcimede	De Man, 1906	Culture/Past
Parapasiphae Alcocki	Wood-Mason <i>in</i> Wood-Mason & Alcock, 1891	People/Scientists
Parilia alcocki	Wood-Mason in Wood-Mason & Alcock, 1891	People/Scientists
Pandalus alcocki	Anderson, 1896	People/Scientists
Calocaris Alcocki	McArdle, 1900	People/Scientists
Thalamita alcocki	De Man, 1902	People/Scientists
Xanthias alcocki	Rathbun, 1902	People/Scientists
Trichopeltarion alcocki	Chun, 1903	People/Scientists
Dorippe facchino var. Alcocki	Nobili, 1903	People/Scientists
Palaemon (Eupalaemon) Alcocki	Nobili, 1903	People/Scientists
Doclea alcocki	Laurie, 1906	People/Scientists
Lambrus (Platylambrus) carinatus var. alcocki	Laurie, 1906	People/Scientists
Lambrus (Pseudolambrus) calappoides var. alcocki	Laurie, 1906	People/Scientists
Xenocarcinus tuberculatus var. alcocki	Laurie, 1906	People/Scientists
Actaea alcocki	Laurie, 1906	People/Scientists
Neptunus (Hellenus) alcocki	Nobili, 1906	People/Scientists
Lioxanthodes alcocki	Calman, 1909	People/Scientists
Pinnotheres alcocki	Rathbun, 1909	People/Scientists
Gennadas alcocki	Kemp, 1910	People/Scientists
Eupagurus alcocki	Balss, 1911	People/Scientists
Philyra alcocki	Kemp, 1915	People/Scientists
Platymaia alcocki	Rathbun, 1916	People/Scientists
Dissodactylus alcocki	Rathbun, 1918	People/Scientists
Latreillopsis alcocki	Stebbing, 1920	People/Scientists
Periclimenes (Periclimenes) alcocki	Kemp, 1922	People/Scientists
Neptunus (Hellenus) alcocki	Gordon, 1930	People/Scientists
Callinectes Alcocki	Chen, 1933	People/Scientists
Conchoedromia alcocki	Chopra, 1934	People/Scientists
Aristeus alcocki	Ramadan, 1938	People/Scientists
Platypodia alcocki	Buitendijk, 1941	People/Scientists
Metapenaeus alcocki	George & Rao, 1968	People/Scientists
Eucrate alcocki	Serène, 1971	People/Scientists
Eucrate alcocki	Serène <i>in</i> Serène & Lohavanijaya, 1973	People/Scientists
Cyphocarcinus alcocki	Griffin & Tranter, 1986	People/Scientists
Demania alcocki	Deb, 1987	People/Scientists
Leucosia alcocki	Ovaere, 1987	People/Scientists
Chaceon alcocki	Ghosh & Manning, 1993	People/Scientists
Ciliopagurus alcocki	Forest, 1995	People/Scientists
Nematopagurus alcocki	McLaughlin, 1997	People/Scientists
Catapagurus alcocki	McLaughlin in Hogarth, Gherardi & McLaughlin, 1998	People/Scientists
Ethusina alcocki	Ng & Ho, 2003	People/Scientists
Uroptychus alcocki	Ahyong & Poore, 2004	People/Scientists
Paguristes alcocki	McLaughlin & Rahayu, 2005	People/Scientists
Munidopsis alcocki	Ahyong, 2014	People/Scientists
Gubernatoriana alcocki	Pati in Pati, Thackeray & Khaire, 2016	People/Scientists
Tubuca alcocki	Shih, Chan & Ng, 2018	People/Scientists
Paralomis alcockiana	Hall & Thatje, 2009	People/Scientists
Potamon (Potamon) alcockianum	Kemp, 1923	People/Scientists
Alpheus alcyone	De Man, 1902	Culture/Past
Caphyra alcyoniophila	Monod, 1928	Ecology/Host
Cambarus (Puncticambarus) aldermanorum	Cooper & Price, 2010	People/Scientists
Eurynome aldrovandi	Risso, 1827	People/Scientists
Periclimenes aleator	Bruce, 1991	Other
Periclimenes alegrias	Bruce, 1986	Expeditions
Paguristes alegrias	Morgan, 1987	Expeditions
Pandalopsis aleutica	Rathbun, 1902	Geography
Eupagurus (Eupagurus) aleuticus	Benedict, 1892	Geography
Macrobrachium alevillalobosi	Mantelatto, Pileggi, Pantaleão, Magalhães, Villalobos & Álvarez, 2021	People/Scientists
Neostrengeria alexae	Campos, 2010	People/Scientists
Alvinocaris alexander	Ahyong, 2009	People/Scientists
Leontocaris alexander	Poore, 2009	People/Scientists
Propontonia alexanderbrucei	Marin, 2023	People/Scientists
Periclimenes alexanderi	Li, 2008	People/Scientists
Acanthocarpus alexandri	Stimpson, 1871	People/Scientists
Heterocarpus alexandri	A. Milne-Edwards, 1883	People/Scientists
Pylopagurus Alexandri	A. Milne-Edwards & Bouvier, 1893	People/Scientists
Callinectes alexandri	Rathbun, 1907	People/Scientists
Solenocera alfonso	Pérez Farfante, 1981	People/Other
Munidopsis alfredolaguardai	Hendrickx & Ayon-Parente, 2013	People/Scientists
Galathea algae	Baba, 1969	Ecology/habitat
Pagurus algarbiensis	de Brito Capello, 1875	Geography
Chorinus algatectus	Sluiter, 1881	Morphology-Shape
Callianassa algerica	Lutze, 1938	Geography
Potamon (Potamon) fluviatilis algeriensis	Bott, 1967	Geography
Coryrhynchus algicola	Stebbing, 1914	Ecology/habitat
Thor algicola	Wicksten, 1987	Ecology/habitat
Ebalia algirica	Lucas, 1846	Geography
Cleistostoma algoense	Barnard, 1954	Geography
Solenocera algoensis	Barnard, 1947	Geography
Munida alia	Baba, 1994	Other
Eusicyonia aliaffinis	Burkenroad, 1934	Other
Diogenes alias	McLaughlin & Holthuis, 2001	Other
Gennadas alicei	Bouvier, 1906	Expeditions
Tiarinia alidae	Griffin & Tranter, 1986	People/Scientists
Paramunida aliena	Macpherson, 1996	Other
Alainodaeus alis	Davie, 1997	Expeditions
Polycheles alis	Ahyong & Galil, 2006	Expeditions
Paralomis alis	Ahyong, 2020	Expeditions
Moloha alisae	Guinot & Richer de Forges, 1995	Expeditions
Agononida alisae	Macpherson, 1999	Expeditions
Nematocarcinus alisae	Burukovsky, 2000	Expeditions
Oxypleurodon alisae	Lee, Richer de Forges & Ng, 2019	Expeditions
Palaemonella aliska	Marin, 2008	People/Other
Glyphocrangon alispina	Chace, 1939	Morphology-Shape
Uroptychus alius	Baba, 2005	Other
Cymonomus alius	Ahyong, 2019	Other
Periclimenaeus alius	Park & De Grave, 2021	Other
Salmoneus alius	Ashrafi, Anker & Ďuriš, 2023	Other
Munidopsis allae	Khodkina & Ďuriš, 1989	People/Other
Alpheopsis allanhancocki	Wicksten, 1992	People/Scientists
Cambarus Alleni	Faxon, 1884	People/Scientists
Actaea allisoni	Garth, 1985	People/Scientists
Parthenope (Platylambrus) allisoni	Garth, 1993	People/Scientists
Crangon allmanni	Kinahan, 1860	People/Scientists
Upogebia allobranchus	Ngoc-Ho, 1991	Morphology-Shape
Pontocaris affinis allodactylus	Chan, 1996	Morphology-Shape
Upogebia allspachi	Sakai, 2006	People/Scientists
Deckenia alluaudi	A. Milne-Edwards & Bouvier, 1893	People/Scientists
Alpheus gracilis var. alluaudi	Coutière, 1905	People/Scientists
Potamon (Potamonautes) alluaudi	Bouvier, 1921	People/Scientists
Orconectes (Crockerinus) alluvius	Simon & McMurray, 2014	Ecology/habitat
Ctenocheloides almeidai	Anker & Pachelle, 2013	People/Scientists
Emerita almeidai	Mantelatto & Balbino <i>in</i> Mantelatto, Paixão, Robles, Teles & Balbino, 2023	People/Scientists
Petrolisthes alobatus	Laurie, 1926	Morphology-Shape
Munida alonsoi	Macpherson, 1994	People/Scientists
Alpheus alope	White, 1847	Other
Uroptychus alophus	Baba, 2018	Morphology-Shape
Moguai aloutos	Tan & Ng, 1999	Morphology-Colour
Heterocrypta aloysioi	Rodrigues da Costa, 1968	People/Scientists
Ogyris alphaerostris	Kingsley, 1880	Morphology-Shape
Athanas alpheoides	Czerniavsky, 1884	Other
Richalpheus alpheoides	Anker, 2011	Other
Salmoneus alpheophilus	Anker & Marin, 2006	Ecology/Host
Alpheus alpheopsides	Coutière, 1905	Other
Athanas alpheusophilus	Marin, 2017	Ecology/Host
Thalamitoides alphonsei	Ward, 1939	People/Scientists
Dicranodromia alphonsei	Martin & Guinot in Guinot, 1995	People/Scientists
Uroptychus alphonsei	Baba & Wicksten, 2017	People/Scientists
Heterocarpus alphonsi	Spence Bate, 1888	People/Scientists
Libystes alphonsi	Alcock, 1900	People/Scientists
Actaea alphonsi	Nobili, 1905	People/Scientists
Caridina alphonsi	Bouvier, 1919	People/Scientists
Palaemon alphonsianus	Hoffmann, 1874	People/Scientists
Ceylonthelphusa alpina	Bahir & Ng, 2005	Ecology/habitat
Cryptolithodes alta-fissura	Spence Bate, 1865	Morphology-Shape
Moritschus altaquerensis	Rodríguez, Campos & López, 2002	Geography
Palicus alternatus	Rathbun, 1897	Other
Solenocera alticarinata	Kubo, 1949	Morphology-Shape
Ibaccus alticrenatus	Spence Bate, 1888	Morphology-Shape
Palaemon altifrons	Henderson, 1893	Morphology-Shape
Varuna altimana	Rathbun, 1914	Morphology-Shape
Cyrtograpsus altimanus	Rathbun, 1914	Morphology-Shape
Ambiaxiopsis altimanus	Komai, 2011	Morphology-Shape
Madangella altirostris	Frolová & Ďuriš, 2018	Morphology-Shape
Sicyonia altirostrum	Crosnier, 2003	Morphology-Shape
Benthesicymus altus	Spence Bate, 1881	Morphology-Shape
Paraxius altus	Spence Bate, 1888	Morphology-Shape
Nematocarcinus altus	Spence Bate, 1888	Morphology-Shape
Uroptychus altus	Baba, 2005	Morphology-Shape
Lebbeus altus	Komai, Chan & Chang, 2021	Morphology-Shape
Caridina alu	Cai & Ng, 2018	Geography
Jogoya alucia	Anker, 2023	Expeditions
Sadayoshia aludra	Macpherson & Baba, 2012	Other
Vietopotamon aluoiensis	Đăng & Hồ, 2002	Geography
Hyas coarctatus var. alutacea	Brandt, 1851	Geography
Actaeomorpha alvae	Boone, 1934	Expeditions
Cambarellus alvarezi	Villalobos, 1952	People/Scientists
Salmoneus alvarezi	Anker & Lazarus, 2015	People/Scientists
Munidopsis alvisca	Williams, 1988	Expeditions
Cherax alyciae	Lukhaup, Eprilurahman & von Rintelen, 2018	People/Other
Hippolyte amabilis	Lenz, 1901	Morphology-Colour
Aretopsis amabilis	De Man, 1910	Morphology-Colour
Synalpheus amabilis	De Man, 1910	Morphology-Colour
Scyllarus amabilis	Holthuis, 1963	Morphology-Colour
Uroptychus amabilis	Baba, 1979	Morphology-Colour
Pulcratis amabilis	Mendoza, Mani & Ravichandran, 2020	Morphology-Colour
Heterocarpus amacula	Crosnier, 1988	Morphology-Colour
Palicus amadaibai	Sakai, 1963	Geography
Geothelphusa amagui	Naruse & Shokita, 2009	Other
Geothelphusa amakusa	Naruse & Ng, 2024	Geography
Litocheira amakusae	Takeda & Miyake, 1969	Geography
Calocaris (Calastacus) amakusana	Miyake & Sakai, 1967	Geography
Petrolisthes amakusensis	Miyake & Nakasone, 1966	Geography
Onycocaris amakusensis	Fujino & Miyake, 1969	Geography
Potamon (Geothelphusa) amalerensis	Rathbun, 1935	Geography
Clistocoeloma amamaparense	Rahayu & Takeda, 2000	Geography
Candidiopotamon amamense	Minei, 1973	Geography
Pilumnus amamensis	Takeda & Miyake, 1968	Geography
Periclimenes (Ancylocaris) amamiensis	Kubo, 1940	Geography
Galathea amamiensis	Miyake & Baba, 1966	Geography
Eualus amandae	Nye, Copley & Linse, 2013	People/Scientists
Munidopsis amapa	Poore, 2014	Geography
Alpheus amarillo	Anker, 2012	Morphology-Colour
Stylodactylus amarynthis	De Man, 1902	Other
Leiogalathea amata	Rodríguez-Flores, Macpherson & Machordom, 2019	Culture/Past
Munida amathea	Macpherson & de Saint Laurent, 1991	Culture/Past
Potamonautes amathole	Peer & Gouws <i>in</i> Peer, Gouws, Maliwa, Barker, Juby & Perissinotto, 2023	Ecology/Host
Hippolyte amazo	Pfeffer, 1886	Morphology-Shape
Athanas amazone	Holthuis, 1951	Culture/Past
Pseudopalaemon amazonensis	Ramos-Porto, 1979	Geography
Palaemon amazonicus	Heller, 1862	Geography
Penaeus amazonicus	Kingsley, 1883	Geography
Speocarcinus amazonicus	Brandão, Tavares & Coelho Filho, 2010	Geography
Euryrhynchus amazoniensis	Tiefenbacher, 1978	Geography
Geelvinkia ambaiana	Bott, 1974	Geography
Geosesarma ambawang	Ng, 2015	Geography
Cancer ambidexter	Forskål, 1775	Morphology-Shape
Maja ambigua	A Costa, 1840	Other
Ebalia ambigua	Bouvier, 1940	Other
Potamon (Potamonautes) ambiguus	Rathbun, 1904	Morphology-Shape
Potamon (Potamon) atkinsonianum var. ambivium	Alcock, 1909	Other
Alpheus amblyonyx	Chace, 1972	Morphology-Shape
Munida amblytes	Macpherson, 1994	Morphology-Shape
Glyphocrangon amblytes	Komai, 2004	Morphology-Shape
Foza ambohitra	Cumberlidge & Meyer, 2009	Geography
Scallasis amboinae	Bate, 1888	Geography
Alpheus amboinae	Zehntner, 1894	Geography
Cancer spinosus amboinensis	Seba, 1759	Geography
Cryptodromia amboinensis	De Man, 1888	Geography
Galathea amboinensis	De Man, 1888	Geography
Anchistia amboinensis	De Man, 1888	Geography
Callianassa amboinensis	De Man, 1888	Geography
Hippolysmata vittata var. amboinensis	De Man, 1888	Geography
Hippolyte amboinensis	De Man, 1888	Geography
Palaemonella amboinensis	Zehntner, 1894	Geography
Arete amboinensis	De Man, 1910	Geography
Charybdis (Charybdis) amboinensis	Leene, 1938	Geography
Camptandrium ambonensis	Serène & Moosa, 1971	Geography
Parapalicus ambonensis	Moosa & Serène, 1981	Geography
Hyastenus ambonensis	Griffin & Tranter, 1986	Geography
Clibanarius ambonensis	Rahayu & Forest, 1993	Geography
Polycheles amemiyai	Yokoya, 1933	People/Scientists
Caridina americana	Guérin-Méneville, 1855	Geography
Pseudo-thelphusa americana	de Saussure, 1857	Geography
Daira americana	Stimpson, 1860	Geography
Anchistia americana	Kingsley, 1878	Geography
Ethusa americana	A. Milne-Edwards, 1880	Geography
Pasiphaeia cristata americana	Faxon, 1893	Geography
Ebalia americana	Rathbun, 1894	Geography
Sicyonia sculpta var. americana	De Man, 1907	Geography
Kraussia americana	Garth, 1939	Geography
Merhippolyte americana	Holthuis, 1961	Geography
Gnathophyllum americanum	Guérin-Méneville, 1855	Geography
Macrobrachium americanum	Spence Bate, 1868	Geography
Homarus americanus	H. Milne Edwards, 1837	Geography
Palinurus americanus	H. Milne Edwards, 1837	Geography
Panopeus americanus	de Saussure, 1857	Geography
Chlorodius americanus	de Saussure, 1857	Geography
Oplophorus americanus	de Saussure, 1858	Geography
Arctus Americanus	Smith, 1869	Geography
Euchirograpsus americanus	A. Milne-Edwards, 1880	Geography
Acetes americanus	Ortmann, 1893	Geography
Pilumnoplax americanus	Rathbun, 1898	Geography
Parapenaeus americanus	Rathbun, 1901	Geography
Goetice americanus	Rathbun, 1923	Geography
Alpheus amethystea	Risso, 1827	Morphology-Colour
Hepatella amica	SI Smith in Verrill, 1869	Ecology/habitat
Sakaija amicitiae	Ng & Richer de Forges, 2021	Other
Huananpotamon amicitiae	Wang, Pan & Sun, 2024	People/Scientists
Parapenaeopsis amicus	Nguyên, 1971	Ecology/Behaviour
Ptychognathus amikee	Hsu & Shih, 2024	People/Scientists
Synalpheus amintae	Ramos-Tafur & Franke-Ante, 2019	People/Other
Alpheus amirantei	Coutière, 1908	Geography
Periclimenes amirantei	Bruce, 2007	Geography
Actumnus setifer amirantensis	Rathbun, 1911	Geography
Neptunus amnicola	de Rochebrune, 1883	Ecology/habitat
Phricotelphusa amnicola	Ng, 1994	Ecology/habitat
Caridina amnicolizambezi	Richard & Clark, 2009	Geography
Potamalpheops amnicus	Yeo & Ng, 1997	Ecology/habitat
Porcellana Amoena	Guérin-Méneville, 1855	Morphology-Colour
Potamonautes amosae	Cumberlidge, Johnson, Clark & Genner, 2021	People/Other
Atergatopsis amoyensis	De Man, 1879	Geography
Litocheira amoyensis	Gordon, 1930	Geography
Caridina amoyensis	Liang & Yan, 1977	Geography
Somanniathelphusa amoyensis	Naiyanetr & Dai, 1997	Geography
Rectopalicus amphiceros	Castro, 2000	Morphology-Shape
Cancer amphioetus	Rathbun, 1898	Morphology-Shape
Phylladiorhynchus amphion	Rodríguez-Flores, Macpherson & Machordom, 2021	Culture/Past
Paramunida amphitrita	Macpherson, 1996	Culture/Past
Cancer amphitrite	Herbst, 1801	Culture/Past
Alpheus amphitrite	White, 1847	Culture/Past
Pagurus amplectens	Fabricius, 1775	Morphology-Shape
Leontocaris amplectipes	Bruce, 1990	Morphology-Shape
Munida ampliantennulata	Komai, 2011	Morphology-Shape
Eumunida ampliata	de Saint Laurent & Poupin, 1996	Morphology-Shape
Eumunida (Eumunidopsis) ampliata	de Saint Laurent & Poupin, 1996	Morphology-Shape
Pasiphaea amplidens	Spence Bate, 1888	Morphology-Shape
Nullicrinis amplifrons	Edmondson, 1935	Morphology-Shape
Macrobrachium amplimanus	Cai & Dai, 1999	Morphology-Shape
Callianassa amplimaxilla	Sakai, 2002	Morphology-Shape
Icotopus amplissimus	Coutière, 1907	Morphology-Shape
Pandalopsis amplus	Spence Bate, 1888	Morphology-Shape
Epialtus amplus	Rathbun, 1933	Morphology-Shape
Icotopus amproxima	Coutière, 1907	Morphology-Shape
Rectopalicus ampullatus	Castro, 2000	Morphology-Shape
Pagurixus amsa	Morgan, 1993	Other
Crangon septemspinosa f. amurensis	Bražnikov, 1907	Geography
Axius spinulicauda amurensis	Kobjakova, 1937	Geography
Periclimenes amymone	De Man, 1902	Culture/Past
Uroptychus anacaena	Baba & Lin, 2008	Morphology-Shape
Automate anacanthopus	De Man, 1910	Morphology-Shape
Automate anacanthopusoides	Wang & Sha, 2017	Morphology-Shape
Periclimenes anacanthus	Bruce, 1988	Morphology-Shape
Upogebia anacanthus	Ngoc-Ho, 1994	Morphology-Shape
Stenalpheops anacanthus	Miya, 1997	Morphology-Shape
Pontonia anachoreta	Kemp, 1922	Other
Pagurus anachoretoides	Forest, 1966	Other
Pagurus anachoretus	Risso, 1827	Other
Potamon (Potamon) anacoluthon	Kemp, 1918	Morphology-Shape
Etisus anaglyptus	H. Milne Edwards, 1834	Morphology-Shape
Atergatis anaglyptus	Heller, 1860	Morphology-Shape
Seulocia anahita	Galil, 2005	Culture/Past
Paguristes anahuacus	Glassell, 1938	Ecology/habitat
Hippa analoga	Stimpson, 1857	Other
Munida analoga	Macpherson, 1993	Other
Munidopsis analoga	Macpherson, 2007	Other
Hemus analogus	Rathbun, 1898	Other
Clythrocerus analogus	Coelho, 1973	Other
Parasesarma anambas	Yeo, Rahayu & Ng, 2004	Geography
Geosesarma anambas	Ng, Wowor & Yeo, 2023	Geography
Paralomis anamerae	Macpherson, 1988	Other
Calcinus anani	Poupin & McLaughlin, 1998	Morphology-Colour
Odontozona anaphorae	Manning & Chace, 1990	Geography
Munidopsis anaramosae	de Matos-Pita & Ramil, 2014	People/Scientists
Typton anaramosae	Neves, 2020	People/Scientists
Collodes anartius	Colavite, Windsor & Santana, 2019	Other
Paguristes anaryballus	Provenzano, 1965	Morphology-Shape
Synalpheus anasimus	Chace, 1972	Morphology-Shape
Crinotonia anastasiae	Marin, 2006	People/Other
Athanas anatidactylus	Anker & Marin, 2007	Morphology-Shape
Uroptychus anatonus	Baba & Lin, 2008	Morphology-Shape
Cancer anatum	Herbst, 1783	Other
Achaeus anauchen	Buitendijk, 1939	Other
Lonchophorus anceps	Eschscholtz, 1825	Morphology-Shape
Lupea anceps	de Saussure, 1857	Morphology-Shape
Eupagurus anceps	Forest, 1954	Morphology-Shape
Synalpheus anceps	Banner, 1956	Morphology-Shape
Epipontonia anceps	Bruce, 1983	Morphology-Shape
Garthiope anchialina	Guinot & Iliffe, 1991	Ecology/habitat
Telphusa Anchietae	de Brito Capello, 1870	People/Scientists
Leiogalathea anchises	Rodríguez-Flores, Macpherson & Machordom, 2019	Culture/Past
Penaeopsis intermedia anchista	De Man, 1920	Culture/Past
Lysmata anchisteus	Chace, 1972	Culture/Past
Alpheus anchistus	De Man, 1920	Other
Penaeus anchoralis	Spence Bate, 1881	Morphology-Shape
Penaeus anchoralis	Spence Bate, 1888	Morphology-Shape
Synalpheus ancistrorhynchus	De Man, 1909	Morphology-Shape
Merhippolyte ancistrota	Crosnier & Forest, 1973	Morphology-Shape
Rizalthus anconis	Mendoza & Ng, 2008	Morphology-Shape
Anebocaris ancylifer	Coutière, 1907	Morphology-Shape
Upogebia (Gebiopsis) ancylodactyla	De Man, 1905	Morphology-Shape
Periclimenaeus ancylodactylus	Bruce, 2014	Morphology-Shape
Geothelphusa ancylophallus	Shy, Ng & Yu, 1994	Morphology-Shape
Sergestes ancylops	Krøyer, 1855	Morphology-Shape
Procambarus ancylus	Hobbs, 1958	Morphology-Shape
Strengeria (Strengeria) andagoensis	Pretzmann, 1965	Geography
Glyphocrangon andamanensis	Wood-Mason <i>in</i> Wood-Mason & Alcock, 1891	Geography
Crangon andamanensis	Wood-Mason <i>in</i> Wood-Mason & Alcock, 1891	Geography
Glyphocrangon investigatoris var. andamanensis	Wood-Mason <i>in</i> Wood-Mason & Alcock, 1891	Geography
Metapenaeus philippinensis var. andamanensis	Wood-Mason <i>in</i> Wood-Mason & Alcock, 1891	Geography
Pentacheles andamanensis	Alcock, 1894	Geography
Chlorotocus gracilipes var. andamanensis	Alcock & Anderson, 1899	Geography
Iconaxiopsis andamanensis	Alcock, 1901	Geography
Periclimenes (Ancylocaris) andamanensis	Kemp, 1922	Geography
Ptychognathus glaber andamanensis	Pretzmann, 1984	Geography
Alainopaguroides andamanensis	McLaughlin, 2002	Geography
Upogebia andamanensis	Sakai, 2015	Geography
Colemanaxius andamanensis	Sakai, 2015	Geography
Platypodia andamania	Deb, 1992	Geography
Ethusa andamanica	Alcock, 1894	Geography
Munida militaris var. andamanica	Alcock, 1894	Geography
Chorilibinia andamanica	Alcock, 1895	Geography
Homola andamanica	Alcock, 1899	Geography
Ptychognathus andamanica	Alcock, 1900	Geography
Spongicola andamanica	Alcock, 1901	Geography
Munidopsis wardeni var. andamanica	MacGilchrist, 1905	Geography
Calliax andamanica	Sakai, 2002	Geography
Palaemon andamanicum	Tiwari, 1952	Geography
Nephrops andamanicus	Wood-Mason, 1892	Geography
Conchoecetes andamanicus	Alcock, 1900	Geography
Spongicola andamanicus	Alcock, 1901	Geography
Cymonomus andamanicus	Alcock, 1905	Geography
Serenius andamanicus	Deb, 1985	Geography
Myopilumnus andamanicus	Deb, 1989	Geography
Etisus andamanicus	Deb, 1992	Geography
Bathyarctus andamanicus	Yang, Chan & Thein, 2024	Geography
Trypaea andamaniensis	Sakai, 2010	Geography
Cambarus (Hiaticambarus) andersoni	Jones & Eversole, 2015	People/Other
Doclea Andersoni	De Man, 1887	People/Scientists
Pilumnus andersoni	De Man, 1887	People/Scientists
Neptunus (Hellenus) Andersoni	De Man, 1887	People/Scientists
Sesarma andersoni	De Man, 1888	People/Scientists
Parapagurus andersoni	Henderson, 1896	People/Scientists
Chlaenopagurus Andersoni	Alcock, 1899	People/Scientists
Telphusa Andersoniana	Wood-Mason, 1871	People/Scientists
Spiralothelphusa andhra	Pati, Mandal & Jaiswal, 2022	Geography
Pilumnus andreossyi	Audouin, 1826	People/Scientists
Periclimenes andresi	Macpherson, 1988	People/Other
Parapagurus andreui	Macpherson, 1984	People/Scientists
Munida andrewi	Macpherson, 1994	People/Scientists
Hyastenus andrewsi	Calman, 1909	People/Scientists
Galathea Andrewsii	Kinahan, 1857	People/Scientists
Hippolyte andrewsii	Kinahan, 1860	People/Scientists
Pilumnus andrewsii	Rathbun, 1898	People/Scientists
Haliporus androgynus	Bouvier, 1906	Morphology-Shape
Nepinnotheres androgynus	Manning, 1993	Morphology-Shape
Alpheus andronyx	Christoffersen, 1998	Other
Synalpheus androsi	Coutière, 1909	Geography
Munidopsis anemia	Macpherson & Segonzac, 2005	Morphology-Shape
Galathea anepipoda	Baba, 1990	Morphology-Shape
Lambdophallus anfractus	Rathbun, 1909	Morphology-Shape
Vultocinus anfractus	Ng & Manuel-Santos, 2007	Morphology-Shape
Epulotheres angelae	Manning, 1993	People/Scientists
Randallia angelica	Garth, 1940	Geography
Pinnotheres angelica	Lockington, 1877	Morphology-Colour
Halicarcinus angelicus	Holthuis, 1968	Morphology-Colour
Neocallichirus angelikae	Sakai, 2000	People/Scientists
Sundathelphusa angelito	Ng & Mendoza, 2020	People/Scientists
Pinnixa angeloi	Righi, 1967	People/Other
Mokayathelphusa angelsotoi	Moreno, Villalobos & Álvarez <i>in</i> Moreno-Juárez, Villalobos & Álvarez, 2022	People/Scientists
Glabrithelphusa angene	Meyer, Cumberlidge & Koppin, 2014	People/Other
Actaea angolensis	de Brito Capello, 1866	Geography
Palaemon (Macrobrachium) jamaicensis var. angolensis	De Man, 1904	Geography
Inachus angolensis	Capart, 1951	Geography
Leptodius angolensis	Bott, 1964	Geography
Philyra angularis	Rathbun, 1924	Morphology-Shape
Cambarus (Cambarus) angularis	Hobbs & Bouchard, 1994	Morphology-Shape
Cancer angulata	Pennant, 1777	Morphology-Shape
Cryptopodia angulata	H. Milne Edwards & Lucas, 1841	Morphology-Shape
Munida angulata	Benedict, 1902	Morphology-Shape
Caridina angulata	Bouvier, 1905	Morphology-Shape
Leucosides angulata	Rathbun, 1911	Morphology-Shape
Actaeomorpha aglypha var. angulata	Ihle, 1918	Morphology-Shape
Podochela angulata	Finnegan, 1931	Morphology-Shape
Petalomera angulata	Sakai, 1936	Morphology-Shape
Heteronucia angulata	Barnard, 1947	Morphology-Shape
Cyclodorippe angulata	Tavares, 1991	Morphology-Shape
Orcovita angulata	Ng, Guinot & Iliffe, 1996	Morphology-Shape
Sinodina angulata	Liang, 2002	Morphology-Shape
Nanhaipotamon angulatum	Dai & Lin <i>in</i> Dai, Chen, Song, Fan, Lin & Zeng, 1979	Morphology-Shape
Pagurus angulatus	Risso, 1816	Morphology-Shape
Cyrtograpsus angulatus	Dana, 1851	Morphology-Shape
Oncinopus angulatus	Haswell, 1880	Morphology-Shape
Caricyphus angulatus	Spence Bate, 1888	Morphology-Shape
Panulirus angulatus	Spence Bate, 1888	Morphology-Shape
Alpheus strenuus var. angulatus	Coutière, 1905	Morphology-Shape
Tlos angulatus	Rathbun, 1906	Morphology-Shape
Chionoecetes angulatus	Rathbun, 1924	Morphology-Shape
Calastacus angulatus	Coelho, 1973	Morphology-Shape
Alpheus angulatus	McClure, 1995	Morphology-Shape
Notonyx angulatus	Naruse & Takeda, 2010	Morphology-Shape
Parthenope angulifrons	Latreille, 1825	Morphology-Shape
Porcellana angulosa	Guérin, 1835	Morphology-Shape
Astacus angulosus	Rathke, 1836	Morphology-Shape
Alpheus angulosus	McClure, 2002	Morphology-Shape
Tiarinia angusta	Dana, 1851	Morphology-Shape
Porcellana angusta	Dana, 1852	Morphology-Shape
Calappa angusta	A. Milne-Edwards, 1880	Morphology-Shape
Eriphia spinifrons f. angusta	Czerniavsky, 1884	Morphology-Shape
Acanthephyra angusta	Spence Bate, 1888	Morphology-Shape
Actaea angusta	Rathbun, 1898	Morphology-Shape
Pseudothelphusa angusta	Rathbun, 1905	Morphology-Shape
Carcinoplax angusta	Rathbun, 1914	Morphology-Shape
Cryptopodia angusta	Rathbun, 1916	Morphology-Shape
Thalassoplax angusta	Guinot, 1969	Morphology-Shape
Metapenaeopsis angusta	Crosnier, 1987	Morphology-Shape
Munida angusta	Macpherson, 2004	Morphology-Shape
Calappa angustata	Fabricius, 1798	Morphology-Shape
Ranilia angustata	Stimpson, 1860	Morphology-Shape
Astacus angustatus	Le Conte, 1855	Morphology-Shape
Nautilograpsus angustatus	Stimpson, 1858	Morphology-Shape
Crangon angusticauda	De Haan, 1844	Morphology-Shape
Caridina angustifolia	Cai & Yuan, 1996	Morphology-Shape
Thelphusa angustifrons	A. Milne-Edwards, 1869	Morphology-Shape
Micippoides angustifrons	A. Milne-Edwards, 1873	Morphology-Shape
Panopeus angustifrons	Benedict & Rathbun, 1891	Morphology-Shape
Gelasimus signatus var. angustifrons	De Man, 1891	Morphology-Shape
Litochira angustifrons	Alcock, 1900	Morphology-Shape
Pisosoma angustifrons	Benedict, 1901	Morphology-Shape
Typhlocarcinops angustifrons	Rathbun, 1914	Morphology-Shape
Oncinopus angustifrons	Takeda & Miyake, 1969	Morphology-Shape
Alpheus angustilineatus	Nomura & Anker, 2005	Morphology-Shape
Crangon franciscorum angustimana	Rathbun, 1902	Morphology-Shape
Malayopotamon angustipedum	Dai & Song, 1982	Morphology-Shape
Sesarma angustipes	Dana, 1852	Morphology-Shape
Potamon (Geothelphusa) angustipes	Schenkel, 1902	Morphology-Shape
Synalpheus herricki angustipes	Coutière, 1909	Morphology-Shape
Typhlocarcinops angustipes	Tesch, 1918	Morphology-Shape
Caridina angustipes	Guo & Liang, 2003	Morphology-Shape
Pontophilus angustirostris	De Man, 1918	Morphology-Shape
Paguristes angustitheca	McLaughlin & Provenzano, 1974	Morphology-Shape
Alpheus brevirostris var. angustodigitus	De Man, 1911	Morphology-Shape
Gopkittisak angustum	Komai, 2011	Morphology-Shape
Menaethius angustus	Dana, 1851	Morphology-Shape
Eupagurus angustus	Stimpson, 1858	Morphology-Shape
Chorilibinia angustus	Lockington, 1877	Morphology-Shape
Xanthodes angustus	Lockington, 1877	Morphology-Shape
Palicus angustus	Rathbun, 1897	Morphology-Shape
Portunus (Achelous) angustus	Rathbun, 1898	Morphology-Shape
Cycloxanthops angustus	Rathbun, 1906	Morphology-Shape
Cheraps preissii var. angustus	McCulloch, 1914	Morphology-Shape
Heterocarpus tricarinatus angustus	Crosnier, 1988	Morphology-Shape
Euastacus angustus	Coughran & Dawkins in Furse, Dawkins & Coughran, 2013	Morphology-Shape
Uroptychus angustus	Baba, 2018	Morphology-Shape
Polyonyx angustus	Osawa, 2018	Morphology-Shape
Sinopotamon yangtsekiense anhuiense	Dai & Fan <i>in</i> Dai, Chen, Song, Fan, Lin & Zeng, 1979	Geography
Macrobrachium anhuiense	Tan, 1991	Geography
Caridina denticulata anhuiensis	Liang, Zhu & Xiong, 1984	Geography
Pagurus aniculus	Fabricius, 1787	Morphology-Shape
Caridina anislaq	Cai, Choy & Ng, 2009	Geography
Synalpheus anisocheir	Stebbing, 1915	Morphology-Shape
Gecarcinus anisocheles	Latreille, 1818	Morphology-Shape
Othonia anisodon	von Martens, 1872	Morphology-Shape
Crangon septemspinosa f. anivensis	Bražnikov, 1907	Geography
Potamon (Geothelphusa) ankaraharae	Nobili, 1906	Geography
Lysmata ankeri	Rhyne & Lin, 2006	People/Scientists
Pontonides ankeri	Marin, 2007	People/Scientists
Synalpheus ankeri	Hultgren & Brandt, 2015	People/Scientists
Alpheus ankeri	Dehghani, Sari & Naderloo, 2019	People/Scientists
Leptalpheus ankeri	Scioli, Robles & Felder, 2024	People/Scientists
Chinapotamon anlongense	Dai & Naiyanetr, 1994	Geography
Upogebia annae	Thistle, 1973	People/Other
Rochinia annae	Richer de Forges & Poore, 2008	People/Scientists
Pseudopagurodes annae	Rahayu & Komai, 2013	People/Scientists
Uroptychus annae	Baba, 2018	People/Scientists
Pseudohelice annamalai	Prema, Hsu, Shih & Ravichandran, 2022	Other
Geotelphusa annamense	Balss, 1914	Geography
Paratya annamensis	Balss, 1924	Geography
Leander annandalei	Kemp, 1917	People/Scientists
Caridina annandalei	Kemp, 1918	People/Scientists
Wolffogebia annandalei	Sakai & Lheknim, 2014	People/Scientists
Potamiscus annandalii	Alcock, 1909	People/Scientists
Thalamita prymna var. annectans	Laurie, 1906	Other
Parasolenocera annectens	Wood-Mason in Wood-Mason & Alcock, 1891	Other
Sympasiphaea annectens	Alcock, 1901	Other
Pagurus annexus	McLaughlin & Haig, 1993	Other
Oxypleurodon annulatum	Richer de Forges & Ng, 2009	Morphology-Colour
Portunus annulatus	Fabricius, 1798	Morphology-Colour
Pandalus annulicornis	Leach, 1815	Morphology-Colour
Pagurus annulicornis	Costa, 1838	Morphology-Colour
Matuta victrix var. annulifera	Henderson, 1887	Morphology-Colour
Ruppellia annulipes	H. Milne Edwards, 1834	Morphology-Shape
Gelasimus annulipes	H. Milne Edwards, 1837	Morphology-Shape
Porcellana annulipes	White, 1847	Morphology-Shape
Pagurus annulipes	H. Milne Edwards, 1848	Morphology-Shape
Eupagurus annulipes	Stimpson, 1860	Morphology-Shape
Cancer Edwardsii var. annulipes	Miers, 1881	Morphology-Shape
Petrolisthes annulipes	Miers, 1884	Morphology-Shape
Potamon (Potamonautes) celebense var. annulipes	Schenkel, 1902	Morphology-Shape
Thalamita annulipes	Stephenson & Hudson, 1957	Morphology-Shape
Eumunida annulosa	de Saint Laurent & Macpherson, 1990	Morphology-Colour
Pagurixus annulus	Komai & Poupin, 2013	Morphology-Colour
Tylaspis anomala	Henderson <i>in</i> Tizard, Moseley, Buchanan & Murray, 1885	Other
Acanthephyra anomala	Boone, 1927	Other
Thalamita anomala	Stephenson & Hudson, 1957	Other
Onycocaris anomala	Bruce, 1979	Other
Myra anomala	Zarenkov, 1990	Other
Thaumastoplax anomalipes	Miers, 1881	Other
Camptandrium anomalum	Shen, 1935	Other
Uroptychus anomalus	Schnabel, 2020	Morphology-Shape
Clibanarius anomalus	A. Milne-Edwards & Bouvier, 1893	Other
Eupagurus anomalus	Balss, 1913	Other
Paguristes anomalus	Bouvier, 1918	Other
Epixanthoides anomalus	Balss, 1935	Other
Potamon (Potamon) anomalus	Chace, 1938	Other
Bannereus anomalus	Bruce, 1988	Other
Onycocaridites anomodactylus	Bruce, 1987	Morphology-Shape
Paratelphusa (Paratelphusa) anophrys	Kemp, 1923	Morphology-Shape
Palaemon anophthalmus	Kollar, 1848	Morphology-Shape
Uroptychus anoploetron	Baba, 2018	Morphology-Shape
Latreutes anoplonyx	Kemp, 1914	Morphology-Shape
Galathea anoplos	Macpherson & Robainas-Barcia, 2015	Morphology-Shape
Callianassa anoploura	Sakai, 2002	Morphology-Shape
Galathea anouchkae	Macpherson & Robainas-Barcia, 2015	People/Scientists
Heteroptychus anouchkae	Baba, 2018	People/Scientists
Callianopsis anovalis	Lin, Komai & Chan, 2007	Morphology-Shape
Tenuilapotamon latilum anshunense	Dai & Li <i>in</i> Dai, Song, Li, Chen, Wang & Hu, 1985	Geography
Dasella ansoni	Bruce, 1983	Expeditions
Leptograpsus ansoni	H. Milne Edwards, 1853	People/Scientists
Potamon (Potamon) potamios hippocratis natio antalyensis	Pretzmann, 1983	Geography
Lithodes antarctica	Hombron & Jacquinot, 1842	Geography
Hippolyte antarctica	Pfeffer, 1887	Geography
Acanthephyra antarctica	Bage, 1938	Geography
Scyllarus antarcticus	Lund, 1793	Geography
Portunus antarcticus	Hombron & Jacquinot, 1846	Geography
Crangon antarcticus	Pfeffer, 1887	Geography
Inachus antarcticus	Doflein, 1904	Geography
Retrocaris antarcticus	Coutière, 1907	Geography
Spirontocaris antarcticus	Hale, 1941	Geography
Sergestes antarcticus	Vereshchaka, 2009	Geography
Paramunida antares	Cabezas, Macpherson & Machordom, 2010	Other
Pasiphaea antea	Rodrigues, Alves-Junior & Cardoso, 2018	Expeditions
Pseudosesarma anteactum	Ng & Schubart, 2017	Other
Munida anteae	Rodríguez-Flores, Macpherson & Machordom, 2022	Expeditions
Actumnus antelmei	Ward, 1942	People/Scientists
Geograpsus antelmei	Ward, 1942	People/Scientists
Penaeus antemarius	Costes, 1890	Morphology-Shape
Cancer antennaria	Stimpson, 1856	Morphology-Shape
Cyclodorippe antennaria	A. Milne-Edwards, 1880	Morphology-Shape
Potamon (Potamon) pealianum var. antennarium	Alcock, 1909	Morphology-Shape
Palemon antennarius	H. Milne Edwards, 1837	Morphology-Shape
Phycodes antennarius	A. Milne-Edwards, 1869	Morphology-Shape
Paguristes antennarius	Rahayu, 2006	Morphology-Shape
Sicyonella antennata	Hansen, 1919	Morphology-Shape
Anchistia antennata	Hansen, 1925	Morphology-Shape
Latreillopsis antennata	Guinot & Richer de Forges, 1995	Morphology-Shape
Penaeus antennatus	Risso, 1816	Morphology-Shape
Clibanarius antennatus	Rahayu & Forest, 1993	Morphology-Shape
Synalpheus antenor	De Man, 1910	Culture/Past
Alpheus antepaenultimus	Kim & Abele, 1988	Morphology-Shape
Alox antheos	Tan & Ng, 1996	Morphology-Shape
Potamon (Geothelphusa) Antheus	Colosi, 1920	Morphology-Shape
Xylopagurus anthonii	Lemaitre, 1995	People/Scientists
Philocheras anthonyi	Taylor, 2010	People/Other
Cancer anthonyi	Rathbun, 1897	People/Scientists
Latreutes antiborealis	Holthuis, 1952	Geography
Plesionika antigai	Zariquiey Álvarez, 1955	People/Scientists
Periclimenes antiguensis	Schmitt, 1924	Geography
Barbouria antiguensis	Chace, 1972	Geography
Eryoneicus antillarum	Bernard, 1953	Geography
Dromidia antillensis	Stimpson, 1858	Geography
Clibanarius antillensis	Stimpson, 1859	Geography
Dromidia antillensis	Stimpson, 1859	Geography
Enoplometopus antillensis	Lütken, 1865	Geography
Axius (Eiconaxius) cristagalli var. antillensis	Bouvier, 1905	Geography
Aristeus antillensis	A. Milne-Edwards & Bouvier, 1909	Geography
Penaeopsis serratus var. antillensis	A. Milne-Edwards & Bouvier, 1909	Geography
Synalpheus minus antillensis	Coutière, 1909	Geography
Osachila antillensis	Rathbun, 1916	Geography
Microphrys antillensis	Rathbun, 1920	Geography
Pseudocoutierea antillensis	Chace, 1972	Geography
Euchirograpsus antillensis	Türkay, 1975	Geography
Pisa antilocapra	Stimpson, 1871	Other
Potamon (Potamon) potamios potamios natio antiochiensis	Pretzmann, 1983	Geography
Strengeriana antioquensis	von Prahl, 1987	Geography
Periclimenes antipathophilus	Spotte, Heard & Bubucis, 1994	Ecology/Host
Arctides antipodarum	Holthuis, 1960	Geography
Bresilia antipodarum	Bruce, 1990	Geography
Balssia antipodarum	Bruce, 2004	Geography
Paramunida antipodes	Ahyong & Poore, 2004	Geography
Spongiocaris antipodes	Schnabel, Kou & Xu, 2021	Geography
Potamon (Potamon) antipoloensis	Rathbun, 1904	Geography
Munida antliae	Macpherson, 2006	Other
Onycocaridella antokha	Marin, 2007	People/Scientists
Phylladiorhynchus antonbruuni	Tirmizi & Javed, 1980	Expeditions
Periclimenes antonbruunii	Bruce, 1967	Expeditions
Potamon (Parathelphusa) antongilensis	Rathbun, 1905	Geography
Galathodes Antonii	Filhol, 1884	People/Scientists
Malayopotamon antonii	Wowor, 2020	People/Scientists
Brachycarpus antonini	Magri, 1926	People/Scientists
Salmoneus antricola	Komai, Yamada & Yunokawa, 2015	Ecology/habitat
Palaemonetes antrorum	Benedict, 1896	Ecology/habitat
Stygothelphusa antu	Ng & Grinang, 2014	Morphology-Colour
Pilarta anuka	Bahir & Yeo, 2007	Morphology-Size
Sinopotamon anyuanense	Dai, Zhou & Peng, 1995	Geography
Scyllarus aoteanus	Powell, 1949	Geography
Halimena aotearoa	Melrose, 1975	Geography
Lithodes aotearoa	Ahyong, 2010	Geography
Uroptychus aotearoa	Schnabel, 2020	Geography
Procambarus apalachicolae	Hobbs, 1942	Geography
Dilocarcinus argentinianus apaluensis	Pretzmann, 1968	Geography
Cancer apancora	Molina, 1782	Other
Paratymolus apeli	Naderloo & Turkay, 2015	People/Scientists
Palapedia apeli	Naderloo, 2015	People/Scientists
Munida apheles	Macpherson, 2006	Morphology-Shape
Guinoplax apheles	Castro & Ng, 2010	Morphology-Shape
Hymenopenaeus aphoticus	Burkenroad, 1936	Ecology/habitat
Pisosoma aphrodita	Boone, 1932	Culture/Past
Actaea aphrodita	Boone, 1934	Culture/Past
Melothelphusa apiaka	Pedraza, Tavares & Magalhães, 2016	People/Other
Odontothelphusa apicpac	Villalobos, García & Velázquez, 2010	Geography
Synalpheus apioceros	Coutière, 1909	Morphology-Shape
Synalpheus apioceros apioceros	Coutière, 1909	Morphology-Shape
Caridina apiocheles	Bouvier, 1904	Morphology-Shape
Caridina apiocheles mut. Edwardsi	Bouvier, 1904	Morphology-Shape
Munida apodis	Macpherson, 2004	Other
Caridina apodosis	Cai & Ng, 1999	Culture/Modern
Periclimenaeus apomonosi	Park & De Grave, 2021	Ecology/habitat
Heteroptychus apophysis	Baba, 2018	Morphology-Shape
Cambarus (Cambarus) appalachiensis	Loughman, Welsh & Thoma, 2017	Geography
Matuta appendiculata	Bosc & Desmarest, 1830	Morphology-Shape
Caridina appendiculata	Jalihal & Shenoy, 1998	Morphology-Shape
Axiopsis (Paraxiopsis) appendiculis	Poore & Griffin, 1979	Morphology-Shape
Neostrengeria libradensis appressa	Campos, 1992	Morphology-Shape
Acanthephyra approxima	Spence Bate, 1888	Other
Synalpheus longicarpus approxima	Coutière, 1909	Other
Palaemon appuni	von Martens, 1869	Other
Hephthopelta apta	Rathbun, 1914	Other
Prionorhynchus apus	Tilesius, 1819	Other
Fredilocarcinus apyratii	Magalhães & Türkay, 1996	Morphology-Shape
Callianassa aqabaensis	Dworschak, 2003	Geography
Hamodactylus aqabai	Bruce & Svoboda, 1983	Geography
Periclimenes aqabai	Bruce, 2008	Geography
Lithoscaptus aquarius	van der Meij, 2023	Ecology/habitat
Upogebia aquilina	Williams, 1993	Morphology-Shape
Persephona punctata aquilonaris	Rathbun, 1933	Morphology-Shape
Euastacus aquilus	Riek, 1969	Morphology-Shape
Urocaridella arabianensis	Akash, Purushothaman, Madhavan, Ravi, Hisham, Sudhakar, Kumar & Kuldeep, 2020	Geography
Ocypode rotundata var. arabica	Nobili, 1906	Geography
Chlorodopsis arabica	Laurie, 1915	Geography
Gebiacantha arabica	Ngoc-Ho, 1989	Geography
Munida arabica	Tirmizi & Javaid, 1992	Geography
Pasiphaea arabica	Timofeev, 1997	Geography
Mursia arabica	Kumar, Kumar & Galil, 2013	Geography
Rubiyana arabica	Anker <i>in</i> Anker, Vimercati, Barreca, Marchese, Chimienti, Terraneo, Rodrigue, Eweida, Qurban, Duarte, Pieribone & Benzoni, 2023	Geography
Indopinnixa arabica	Lasley, Anker & Naruse, 2024	Geography
Paracleistostoma arabicum	Jones & Clayton, 1983	Geography
Salmoneus arabicus	Anker, 2022	Ecology/Host
Inachus arabicus	Rüppell, 1830	Geography
Neptunus (Hellenus) arabicus	Nobili, 1905	Geography
Periclimenes (Periclimenaeus) arabicus	Calman, 1939	Geography
Scyllarus batei arabicus	Holthuis, 1960	Geography
Metapenaeus arabicus	Hassan, 1978	Geography
Athanas arabicus	Afzal, Javed & Barkati, 1986	Geography
Macrobrachium aracamuni	Rodríguez, 1982	Geography
Microthelphusa aracamuniensis	Suárez, 2015	Geography
Pyromaia arachna	Rathbun, 1924	Morphology-Shape
Acheles arachnipodus	Cocco, 1832	Morphology-Shape
Cancer arachnoides	Linnaeus, 1758	Morphology-Shape
Nobilum arachnoides	Manning & Holthuis, 1986	Morphology-Shape
Macropus aracnides	Risso, 1816	Morphology-Shape
Paralomis arae	Macpherson, 2001	Other
Munida arae	Macpherson, 2006	Other
Somanniathelphusa araeochelus	Naiyanetr & Dai, 1997	Morphology-Shape
Pseudopaguristes araeos	Rahayu, 2007	Morphology-Shape
Andamancalliax arafura	Poore, 2021	Geography
Caviallianassa arafura	Poore, 2023	Geography
Pontocheras arafurae	Bruce, 1988	Geography
Nephrops arafurensis	De Man, 1905	Geography
Cryptolutea arafurensis	Davie & Humpherys, 1997	Geography
Parapenaeopsis arafurica	Racek & Dall, 1965	Geography
Geothelphusa aramotoi	Minei, 1973	People/Scientists
Litocheira aranea	Tesch, 1918	Morphology-Shape
Pagurus araneiformis	Fabricius, 1775	Morphology-Shape
Cancer araneus	Linnaeus, 1758	Morphology-Shape
Inachus (Oncinopus) araneus	De Haan, 1839	Morphology-Shape
Potamon (Geothelphusa) araneus	Rathbun, 1905	Morphology-Shape
Kiwa araonae	Lee, Lee & Won, 2016	Expeditions
Aegla araucaniensis	Jara, 1980	Geography
Parastacus araucanius	Faxon, 1914	Geography
Kasagia arbastoi	Richer de Forges & Ng, 2007	People/Scientists
Odontozona arbur	Saito, Okuno & Anker, 2017	Other
Actumnus arbutum	Alcock, 1898	Ecology/habitat
Ovitamon arcanum	Ng & Takeda, 1992	Other
Processa edulis arcassonensis	Nouvel & Holthuis, 1957	Geography
Caphyra Archeri	Walker, 1887	People/Other
Alpheus architectus	De Man, 1897	Ecology/habitat
Yuexipotamon arcophallus	Huang, Mao & Huang, 2014	Morphology-Shape
Pinnotheres arcophilus	Bürger, 1895	Ecology/Host
Lithodes arctica	Latreille, 1806	Geography
Cancer arctica	Dewhurst, 1834	Geography
Sergestes arcticus	Krøyer, 1855	Geography
Cancer arctus	Linnaeus, 1758	Geography
Hypoconcha arcuata	Stimpson, 1858	Morphology-Shape
Hypoconcha arcuata	Stimpson, 1859	Morphology-Shape
Ceratoplax arcuata	Miers, 1884	Morphology-Shape
Spirontocaris arcuata	Rathbun, 1902	Morphology-Shape
Pseudothelphusa zurstrasseni arcuata	Bott, 1956	Morphology-Shape
Spirontocaris arcuatoides	Kobjakova, 1962	Morphology-Shape
Aparapotamon arcuatum	Dai & Chen, 1985	Morphology-Shape
Portunus arcuatus	Leach, 1814	Morphology-Shape
Portunus (Thalamita) arcuatus	De Haan, 1833	Morphology-Shape
Callinectes arcuatus	Ordway, 1863	Morphology-Shape
Xantho arcuatus	Heller, 1865	Morphology-Shape
Solenolambrus arcuatus	Stimpson, 1871	Morphology-Shape
Sympagurus arcuatus	A. Milne-Edwards & Bouvier, 1893	Morphology-Shape
Pagurus arcuatus	Squires, 1964	Morphology-Shape
Chasmocarcinus arcuatus	Coelho Filho & Coelho, 1998	Morphology-Shape
Icotopus arcurostris	Spence Bate, 1888	Morphology-Shape
Karstarma ardea	Wowor & Ng, 2009	Morphology-Shape
Periclimenaeus ardeae	Bruce, 1970	Geography
Pontonia ardeae	Bruce, 1981	Geography
Glyphocrangon arduus	Komai, 2007	Ecology/habitat
Axianassa arenaria	Kensley & Heard, 1990	Ecology/habitat
Cancer arenarius	Toreen <i>in</i> Osbeck, 1765	Ecology/habitat
Cancer arenarius	Catesby, 1771	Ecology/habitat
Cancer arenarius	Zimmermann in Cavolini, 1792	Ecology/habitat
Ocypode arenarius	Say, 1817	Ecology/habitat
Pagurus arenarius	Lucas, 1846	Ecology/habitat
Crangon arenensis	Chace, 1937	Geography
Pinnixa arenicola	Rathbun, 1922	Ecology/habitat
Alpheus arenicolus	Banner & Banner, 1983	Ecology/habitat
Pagurus arenisaxatilis	Harvey & McLaughlin, 1991	Ecology/habitat
Callianassa arenosa	Poore, 1975	Ecology/habitat
Munidopsis arenula	Macpherson, 2007	Morphology-Shape
Trapezia areolata	Dana, 1852	Morphology-Shape
Actaea areolata	Dana, 1852	Morphology-Shape
Cambarus Montezumae var. areolata	Faxon, 1885	Morphology-Shape
Galacantha areolata	Wood-Mason in Wood-Mason & Alcock, 1891	Morphology-Shape
Paracrangon areolata	Faxon, 1893	Morphology-Shape
Micropanope areolata	Rathbun, 1898	Morphology-Shape
Cryptodromia areolata	Ihle, 1913	Morphology-Shape
Chlorodius areolatus	H. Milne Edwards, 1834	Morphology-Shape
Menaethius areolatus	Dana, 1851	Morphology-Shape
Actaeodes areolatus	Dana, 1852	Morphology-Shape
Heloecius areolatus	Heller, 1862	Morphology-Shape
Mithrax areolatus	Lockington, 1877	Morphology-Shape
Panopeus areolatus	Benedict & Rathbun, 1891	Morphology-Shape
Athanas areteformis	Coutière, 1903	Morphology-Shape
Clibanarius arethusa	De Man, 1888	Culture/Past
Alpheus arethusa	De Man, 1909	Culture/Past
Paralomis arethusa	Macpherson, 1994	Culture/Past
Typhlatya arfeae	Jaume & Bréhier, 2005	Expeditions
Amphitrite argentata	White, 1847	Morphology-Colour
Neptunus argentatus	A. Milne-Edwards, 1861	Morphology-Colour
Callianassa argentinensis	Biffar, 1971	Geography
Trichodactylus (Dilocarcinus) argentinianus	Rathbun, 1905	Geography
Palaemonetes argentinus	Nobili, 1901	Geography
Lysmata argentopunctata	Wicksten, 2000	Morphology-Colour
Argis argilicola	Krøyer, 1843	Ecology/habitat
Cambarus argillicola	Faxon, 1884	Ecology/habitat
Uca argillicola	Crane, 1941	Ecology/habitat
Gilvossius arguinensis	Sakai, Türkay, Beuck & Freiwald, 2015	Geography
Diogenes arguinensis	Almón, Cuesta & García-Raso, 2022	Geography
Galathea argus	Macpherson & Robainas-Barcia, 2015	Culture/Past
Phylladiorhynchus argus	Rodríguez-Flores, Macpherson & Machordom, 2021	Culture/Past
Palinurus argus	Latreille, 1804	Morphology-Colour
Calcinus argus	Wooster, 1984	Morphology-Colour
Munidopsis ariadne	Macpherson, 2011	Culture/Past
Onconida ariel	Ahyong, Taylor & McCallum, 2013	Culture/Modern
Pisa aries	Latreille, 1825	Culture/Past
Halimus aries	Guérin, 1832	Culture/Past
Orophorhynchus aries	A. Milne-Edwards, 1880	Culture/Past
Munidopsis arietina	Alcock & Anderson, 1894	Culture/Past
Upogebia aristata	Le Loeuff & Intes, 1974	Morphology-Shape
Alpheopsis aristoteles	Anker, 2017	Culture/Past
Lissocarcinus arkati	Kemp, 1923	Other
Cancer armadillus	Herbst, 1790	Morphology-Shape
Homeryon armarium	Galil, 2000	Morphology-Shape
Maia armata	Latreille, 1803	Morphology-Shape
Megalopa armata	Leach, 1815	Morphology-Shape
Mursia armata	De Haan, 1837	Morphology-Shape
Euphema armata	H. Milne Edwards, 1837	Morphology-Shape
Pontonia armata	H. Milne Edwards, 1837	Morphology-Shape
Doclea armata	De Haan, 1839	Morphology-Shape
Hippolite armata	Owen, 1839	Morphology-Shape
Dorippe armata	White, 1847	Morphology-Shape
Ilia armata	Gibbes, 1850	Morphology-Shape
Porcellana armata	Gibbes, 1850	Morphology-Shape
Porcellana armata	Dana, 1852	Morphology-Shape
Eriphia armata	Dana, 1852	Morphology-Shape
Tetralia armata	Dana, 1852	Morphology-Shape
Sceletina armata	Dana, 1852	Morphology-Shape
Atya armata	A. Milne-Edwards, 1864	Morphology-Shape
Banareia armata	A. Milne-Edwards, 1869	Morphology-Shape
Callianassa armata	A. Milne-Edwards, 1870	Morphology-Shape
Epilobocera armata	Smith, 1870	Morphology-Shape
Nibilia armata	A. Milne-Edwards, 1880	Morphology-Shape
Acanthephyra armata	A. Milne-Edwards, 1881	Morphology-Shape
Dorippe armata	Miers, 1881	Morphology-Shape
Porcellanides longimana var. armata	Czerniavsky, 1884	Morphology-Shape
Porcellanides Rissoi var. armata	Czerniavsky, 1884	Morphology-Shape
Platythelphusa armata	A. Milne-Edwards, 1887	Morphology-Shape
Amphion armata	Koeppel, 1902	Morphology-Shape
Munida armata	Baba, 1988	Morphology-Shape
Perbrinckia armata	Ng, 1995	Morphology-Shape
Glyphocrangon armata	Komai, 2004	Morphology-Shape
Lissosabinea armata	Komai, 2006	Morphology-Shape
Ocypode (Cardisoma) armatum	Herklots, 1851	Morphology-Shape
Tozeuma armatum	Paulson, 1875	Morphology-Shape
Cancer (Acanthodes) armatus	De Haan, 1835	Morphology-Shape
Pseudocorystes armatus	H. Milne Edwards, 1837	Morphology-Shape
Chorinus armatus	Randall, 1840	Morphology-Shape
Peloeus armatus	Eydoux & Souleyet, 1842	Morphology-Shape
Bernhardus armatus	Dana, 1851	Morphology-Shape
Mithrax armatus	de Saussure, 1853	Morphology-Shape
Potamocarcinus armatus	H. Milne Edwards, 1853	Morphology-Shape
Sergestes armatus	Krøyer, 1855	Morphology-Shape
Neptunus armatus	A. Milne-Edwards, 1861	Morphology-Shape
Picrocerus armatus	A. Milne-Edwards, 1865	Morphology-Shape
Astacus armatus	von Martens, 1866	Morphology-Shape
Dilocarcinus armatus	A. Milne-Edwards, 1869	Morphology-Shape
Diptychus armatus	A. Milne-Edwards, 1880	Morphology-Shape
Elasmonotus armatus	A. Milne-Edwards, 1880	Morphology-Shape
Axius armatus	Smith, 1881	Morphology-Shape
Aristeus armatus	Spence Bate, 1881	Morphology-Shape
Paramithrax (Chlorinoides) aculeatus var. armatus	Miers, 1884	Morphology-Shape
Collodes armatus	Rathbun, 1898	Morphology-Shape
Alpheus armatus	Rathbun, 1901	Morphology-Shape
Benthesicymus armatus	MacGilchrist, 1905	Morphology-Shape
Paguristes armatus	Hay, 1917	Morphology-Shape
Lambrus (Rhinolambrus) armatus	Flipse, 1930	Morphology-Shape
Palaemon (Parapalaemon) trompi armatus	Roux, 1936	Morphology-Shape
Etisodes armatus	Ward, 1942	Morphology-Shape
Eryoneicus armatus	Bernard, 1953	Morphology-Shape
Metanephrops armatus	Chan & Yu, 1991	Morphology-Shape
Parapalicus armatus	Castro, 2000	Morphology-Shape
Salmoneus armatus	Anker, 2010	Morphology-Shape
Pilumnus armatus	Komai & Motoh, 2012	Morphology-Shape
Diogenes armatus	Almón, Cuesta, Schubart & García Raso <i>in</i> Almón, Cuesta, Schubart, Armenia & García Raso, 2021	Morphology-Shape
Potamon (Centropotamon) magnum armenicum	Pretzmann, 1962	Geography
Cancer armiger	Fabricius, 1787	Morphology-Shape
Pilodius armiger	Nobili, 1906	Morphology-Shape
Munida armilla	Macpherson, 1994	Morphology-Colour
Alpheus armillatus	H. Milne Edwards, 1837	Morphology-Colour
Hippolyte longirostris armoricana	Sollaud in Bourdon, 1965	Geography
Encephaloides armstrongi	Wood-Mason in Wood-Mason & Alcock, 1891	People/Scientists
Micropanope armstrongi	Garth, 1948	People/Scientists
Pudaengon arnamicai	Ng & Naiyanetr, 1995	People/Scientists
Monodaeus arnaudi	Guinot & Macpherson, 1988	People/Scientists
Mictaxius arno	Poore, 1997	Geography
Alpheus arnoa	Banner, 1957	Geography
Cancer arnoldorum	Curtiss, 1938	People/Scientists
Campylonotus arntzianus	Thatje, 2003	People/Scientists
Parapenaeopsis aroaensis	Hall, 1962	Geography
Pilarta aroma	Pati, Rajesh, Raj, Sheeja, Biju Kumar & Sureshan, 2017	Morphology-Shape
Paguristes arostratus	Rahayu, 2006	Morphology-Shape
Synalpheus arostris	Wicksten, 1989	Morphology-Shape
Paratya australiensis arrostra	Riek, 1953	Morphology-Shape
Austinixa artankeri	Palacios Theil & Felder, 2020	People/Scientists
Periclimenaeus arthrodactylus	Holthuis, 1952	Morphology-Shape
Lissosabinea arthuri	Taylor & Collins, 2009	People/Scientists
Nheena artiaregina	Cumberlidge, Soma, Leever & Daniels, 2023	People/Other
Callianassa articulata	Rathbun, 1906	Morphology-Shape
Uroptychus articulatus	Baba, 2018	Morphology-Shape
Virbius gracilis var. articulirostris	Czerniavsky, 1884	Morphology-Shape
Dromia artificiosa	Weber, 1795	Morphology-Shape
Dromia artificiosa	Fabricius, 1798	Morphology-Shape
Telphusa artifrons	Bürger, 1894	Morphology-Shape
Petrolisthes artifrons	Haig, 1960	Morphology-Shape
Automate arturi	Ashrafi & De Grave, 2023	People/Scientists
Stereomastis artuzi	Artüz, Kubanç & Kubanç, 2014	People/Scientists
Potamon (Geotelphusa) aruana	Roux, 1911	Geography
Cheraps aruanus	Roux, 1911	Geography
Jousseaumea arubae	Schmitt, 1936	Geography
Caridina aruensis	Roux, 1911	Geography
Snaha aruna	Bahir & Yeo, 2007	Morphology-Colour
Vulcanocalliax arutyunovi	Dworschak & Cunha, 2007	People/Scientists
Lysmata arvoredensis	Giraldes, Macedo, Brandão, Baeza & Freire, 2018	Geography
Viridotheres asaphis	Ahyong, 2020	Ecology/Host
Leiogalathea ascanius	Rodríguez-Flores, Macpherson & Machordom, 2019	Culture/Past
Paramunida ascella	Cabezas, Macpherson & Machordom, 2010	Other
Gnathophyllum ascensione	Manning & Chace, 1990	Geography
Alpheus ascensionis	Ortmann, 1893	Geography
Procaris ascensionis	Chace & Manning, 1972	Geography
Typton ascensionis	Manning & Chace, 1990	Geography
Periclimenaeus ascidiarum	Holthuis, 1951	Ecology/Host
Pinnoteres ascidicola	Hesse, 1872	Ecology/Host
Pontonia ascidicola	Borradaile, 1898	Ecology/Host
Phylladiorhynchus asclepius	Rodríguez-Flores, Macpherson & Machordom, 2021	Culture/Past
Micropanope ashcrafti	Garth, 1986	People/Scientists
Penaeus ashiaka	Kishinouye, 1900	Geography
Sinodina ashima	Jiang, Zhou, Wang, Chen & Chen, 2023	Culture/Past
Vanni ashini	Bahir & Yeo, 2007	Other
Nippontonia ashmoreiensis	Bruce, 2014	Geography
Pisidia asiatica	Leach, 1821	Geography
Hippa asiatica	H. Milne Edwards, 1837	Geography
Cryptodromia asiatica	Parisi, 1915	Geography
Parapinnixa asiatica	Sakai, 1933	Geography
Munidopsis asiatica	Marin, 2020	Geography
Neosarmatium asiaticum	Ragionieri, Fratini & Schubart, 2012	Geography
Polyonyx asiaticus	Shen, 1936	Geography
Sclerocrangon variabilis asiaticus	Kobjakova, 1955	Geography
Cardisoma aspasia	Adams, 1847	Morphology-Shape
Xantho asper	Rüppell, 1830	Morphology-Shape
Mithrax asper	H. Milne Edwards, 1831	Morphology-Shape
Pagurus asper	H. Milne Edwards, 1848	Morphology-Shape
Pagurus asper	De Haan, 1849	Morphology-Shape
Palaemon asper	Stimpson, 1860	Morphology-Shape
Neptunus asper	A. Milne-Edwards, 1861	Morphology-Shape
Callidactylus asper	Stimpson, 1871	Morphology-Shape
Cymopolus asper	A. Milne-Edwards, 1880	Morphology-Shape
Elasmonotus asper	Henderson, 1885	Morphology-Shape
Nisto asper	Sarato, 1885	Morphology-Shape
Trachypenaeus asper	Alcock, 1905	Morphology-Shape
Eiconaxius asper	Rathbun, 1906	Morphology-Shape
Polycheles asper	Rathbun, 1906	Morphology-Shape
Chlorodiella asper	Edmondson, 1925	Morphology-Shape
Homologenus asper	Zarenkov in Zarenkov & Khodkina, 1983	Morphology-Shape
Hepatoporus asper	Davie & Turner, 1994	Morphology-Shape
Pseudopaguristes asper	Rahayu, 2005	Morphology-Shape
Trichopagurus asper	Komai & Poupin, 2012	Morphology-Shape
Mirograpsus asper	Komai & Fujita, 2018	Morphology-Shape
Cancer aspera	Pennant, 1777	Morphology-Shape
Ebalia aspera	A. Costa, 1853	Morphology-Shape
Arcania novemspinosa var. aspera	Miers, 1880	Morphology-Shape
Paralomis aspera	Faxon, 1893	Morphology-Shape
Mursia aspera	Alcock, 1899	Morphology-Shape
Thoe aspera	Rathbun, 1901	Morphology-Shape
Parapontocaris aspera	Chace, 1984	Morphology-Shape
Sundathelphusa aspera	Ng & Stuebing, 1989	Morphology-Shape
Neostrengeria aspera	Campos, 1992	Morphology-Shape
Pycnoplax aspera	Castro, 2009	Morphology-Shape
Paramunida aspera	Cabezas & Chan, 2014	Morphology-Shape
Mariaplax aspera	Ng & Rahayu, 2015	Morphology-Shape
Potamon (Potamon) andersonianum var. asperatum	Alcock, 1909	Morphology-Shape
Lioxantho asperatus	Alcock, 1898	Morphology-Shape
Atergatis asperimanus	White, 1848	Morphology-Shape
Paramicippa asperimanus	Miers, 1884	Morphology-Shape
Cambarus bartonii asperimanus	Faxon, 1914	Morphology-Shape
Ombrastacoides asperrimanus	Hansen & Richardson, 2006	Morphology-Shape
Neolithodes asperrimus	Barnard, 1947	Morphology-Shape
Pagurus aspersus	Berthold, 1846	Morphology-Shape
Pontonides asperulatus	Bruce, 2005	Morphology-Shape
Palaemon asperulus	von Martens, 1868	Morphology-Shape
Elamenopsis aspinifera	Lucas, 1981	Morphology-Shape
Bathymunida aspinirostris	Khodkina, 1981	Morphology-Shape
Potamon potamios aspöcki	Pretzmann, 1986	People/Scientists
Pseudothelphusa (Zilchia) aspoeckorum	Pretzmann, 1968	People/Scientists
Munida asprosoma	Ahyong & Poore, 2004	Morphology-Colour
Palaemon assamensis	Tiwari, 1958	Geography
Palaemon assamensis assamensis	Tiwari, 1958	Geography
Currothelphusa asserpes	Ng, 1990	Morphology-Shape
Plesionika assimilis	De Man, 1917	Other
Glyphocrangon assimilis	De Man, 1918	Other
Penaeopsis assimilis	De Man, 1920	Other
Callianassa (Callichirus) assimilis	De Man, 1928	Other
Alpheus hailstonei var. assimulans	De Man, 1908	Other
Upogebia assisi	Barnard, 1947	Other
Laomedia astacina	De Haan, 1841	Other
Calcinus astathes	Stebbing, 1924	Other
Anisopagurus asteriscus	Lemaitre, 2020	Morphology-Shape
Neolioxantho asterodactylus	Garth & Kim, 1983	Morphology-Shape
Scyllarides astori	Holthuis, 1960	Morphology-Colour
Alpheus astrinx	Banner & Banner, 1982	Morphology-Shape
Thyrolambrus astroides	Rathbun, 1894	Morphology-Shape
Dorippe astuta	Weber, 1795	Other
Dorippe astuta	Fabricius, 1798	Other
Potamonemus asylos	Cumberlidge, 1993	Ecology/habitat
Palaemonella asymmetrica	Holthuis, 1951	Morphology-Shape
Macrobrachium atabapense	Pereira S., 1986	Geography
Paratya atacta	Riek, 1953	Other
Macrobrachium atactum atactum	Riek, 1951	Other
Munida atarapa	Macpherson, 2013	Culture/Past
Eurypanopeus abbreviatus ater	Rathbun, 1930	Morphology-Colour
Crosnierocaris athanasoides	Anker, 2022	Other
Edoneus atheatus	Holthuis, 1978	Morphology-Shape
Typhlocarcinops atimovatae	Ng & Rahayu, 2020	Expeditions
Paragiopagurus atkinsonae	Landschoff & Lemaitre, 2017	People/Scientists
Cambarus (Procambarus) atkinsoni	Ortmann, 1913	People/Scientists
Telphusa Atkinsoniana	Wood-Mason, 1871	People/Scientists
Marestia atlantica	Dana, 1852	Geography
Varuna atlantica	Melliss, 1875	Geography
Pilumnoplax sulcatifrons var. atlantica	Miers, 1881	Geography
Nephropsis atlantica	Norman, 1882	Geography
Prionoplax atlantica	Kendall in AC Adams & Kendall, 1891	Geography
Pericera atlantica	Rathbun, 1892	Geography
Bresilia atlantica	Calman, 1896	Geography
Psathyrocaris infirma var. atlantica	Caullery, 1896	Geography
Ebalia (Phlyxia) atlantica	A. Milne-Edwards & Bouvier, 1898	Geography
Coralliocaris atlantica	Rathbun, 1901	Geography
Dromia atlantica	Doflein, 1904	Geography
Cyclois bairdii var. atlantica	Verrill, 1908	Geography
Parapenaeopsis atlantica	Balss, 1914	Geography
Callianassa atlantica	Rathbun, 1926	Geography
Glyphocrangon (Plastocrangon) caecescens atlantica	Chace, 1939	Geography
Palaemonella atlantica	Holthuis, 1951	Geography
Pylopaguropsis atlantica	Wass, 1963	Geography
Munida atlantica	de Melo-Filho & de Melo, 1994	Geography
Podochela (Anisonotus) atlantica	Coelho, 1997	Geography
Naxia atlantica	Tavares & Poore, 2014	Geography
Sergestes atlanticus	H. Milne Edwards, 1830	Geography
Lambrus (Parthenopoides) massena var. atlanticus	Miers, 1881	Geography
Notopus (Raninoides) atlanticus	Studer, 1883	Geography
Puer atlanticus	Bouvier, 1905	Geography
Eryoneicus atlanticus	Lenz & Strunck, 1914	Geography
Notostomus atlanticus	Lenz <i>in</i> Lenz & Strunck, 1914	Geography
Procletes atlanticus	Lenz <i>in</i> Lenz & Strunck, 1914	Geography
Pagurodes atlanticus	Bouvier, 1922	Geography
Asthenognathus atlanticus	Monod, 1933	Geography
Discias atlanticus	Gurney, 1939	Geography
Brachynotus atlanticus	Forest, 1957	Geography
Uroptychus atlanticus	Baba & Wicksten, 2017	Geography
Anapagurus atlantidii	García-Gómez, 1994	Expeditions
Solenocera atlantidis	Burkenroad, 1939	Expeditions
Paracyclois atlantis	Chace, 1939	Expeditions
Munidopsis atlantis	Ahyong, 2014	Geography
Conchoecetes atlas	McLay & Naruse, 2019	Culture/Past
Chanopagurus atopos	Lemaitre, 2003	Other
Chaceon atopus	Manning & Holthuis, 1989	Other
Pinnotheres sinensis atrinae	Sakai, 1939	Ecology/Host
Pinnotheres atrinicola	Page, 1983	Ecology/Host
Palaemonetes atrinubes	Bray, 1976	Morphology-Shape
Xanthodes atromanus	Haswell, 1881	Morphology-Shape
Dorippe atropos	Lamarck, 1818	Culture/Past
Aegla atropos	Bueno & Tavares <i>in</i> Bueno, Camargo, Lobo, Vera-Silva, Tavares & Mantelatto, 2024	Culture/Past
Ghatiana atropurpurea	Pati, Thackeray & Khaire, 2016	Morphology-Colour
Sclerocrangon atrox	Faxon, 1893	Other
Metapenaeopsis philippii var. attaqa	Al-Kholy & El-Hawary, 1970	Other
Pachycheles attaragos	Harvey & De Santo, 1997	Morphology-Shape
Ctenocheloides attenboroughi	Anker, 2010	People/Scientists
Kingsleya attenboroughi	Pinheiro & Santana, 2016	People/Scientists
Hobbseus attenuatus	Black, 1969	Morphology-Shape
Periclimenes attenuatus	Bruce, 1971	Morphology-Shape
Oreotlos atticus	Galil & Ng, 2023	Other
Procambarus (Ortmannicus) attiguus	Hobbs & Franz, 1992	Other
Galathea atua	Macpherson & Robainas-Barcia, 2015	Culture/Past
Caridina atyoides	Nobili, 1900	Other
Petalomera atypica	Sakai, 1936	Other
Achaeopsis atypicus	Rathbun, 1932	Other
Coralliocaris (Onycocaris) aualitica	Nobili, 1904	Geography
Thalamita auauensis	Rathbun, 1906	Geography
Thelphusa aubryi	H. Milne Edwards, 1853	People/Scientists
Neocallichirus auchenorhynchus	Sakai, 2005	Morphology-Shape
Hyastenus auctus	Rathbun, 1916	Morphology-Shape
Callianassa audax	De Man, 1911	Morphology-Shape
Palaemon audouini	Heller, 1861	People/Scientists
Brachycarpus audouini	Spence Bate, 1888	People/Scientists
Alpheus audouini	Coutière, 1905	People/Scientists
Cyclograpsus audouinii	H. Milne Edwards, 1837	People/Scientists
Eurypodius audouinii	H. Milne Edwards & Lucas, 1842	People/Scientists
Espeleonaushonia augudrea	Juarrero & García in Juarrero, García & Martínez-Iglesías, 1997	People/Other
Paguristes aulacis	Rahayu & Forest, 2009	Morphology-Shape
Kingsleya fossor aulae	Bott, 1970	Morphology-Shape
Munida aulakodes	Macpherson, 2006	Morphology-Shape
Solinca aulix	Colavite, Windsor & Santana, 2019	Morphology-Shape
Gourretia aungtonyae	Sakai, 2002	People/Scientists
Periclimenaeus aurae	dos Santos, Calado & Araújo, 2008	People/Scientists
Munidopsis aurantia	Lin & Chan, 2011	Morphology-Colour
Anchistia aurantiaca	Dana, 1852	Morphology-Colour
Glyphocrangon aurantiaca	Holthuis, 1971	Morphology-Colour
Rimicaris aurantiaca	Martin, Signorovitch & Patel, 1997	Morphology-Colour
Pagurixus aurantiaca	Komai, 2010	Morphology-Colour
Ghatiana aurantiaca	Pati & Sharma, 2014	Morphology-Colour
Manaxius aurantiaca	Komai, 2020	Morphology-Colour
Munida aurantiaca	Macpherson, Rodríguez-Flores & Machordom, 2020	Morphology-Colour
Periclimenaeus aurantiacus	Bruce, 2014	Morphology-Colour
Tetralia aurantistellata	Trautwein, 2007	Morphology-Colour
Geosesarma aurantium	Ng, 1995	Morphology-Colour
Sympagurus aurantium	Lemaitre, 2004	Morphology-Colour
Hexaplax aurantium	Rahayu & Ng, 2014	Morphology-Colour
Cancer aurantius	Herbst, 1799	Morphology-Colour
Opecarcinus aurantius	Kropp, 1989	Morphology-Colour
Potamonautes aurantius	Mengel & Daniels, 2024	Morphology-Colour
Macrobrachium auratum	Short, 2004	Morphology-Colour
Plesionida aurelia	Ahyong, Taylor & McCallum, 2013	Morphology-Colour
Nanhaipotamon aureomarginatum	Huang, Mao & Shih, 2021	Morphology-Colour
Scyllarus aureus	Holthuis, 1963	Morphology-Colour
Hainanpotamon auriculatum	Yeo & Naruse, 2008	Morphology-Shape
Sinolapotamon auriculatum	Zhu, Naruse & Zhou, 2009	Morphology-Shape
Pentacheles auriculatus	Spence Bate, 1878	Morphology-Shape
Notostomus auriculatus	Barnard, 1950	Morphology-Shape
Portunus aurimanus	Gundlach & Torralbas, 1900	Morphology-Colour
Pisa aurita	Latreille, 1825	Morphology-Shape
Hephthopelta aurita	Rathbun, 1932	Morphology-Shape
Minpotamon auritum	Wang, Pan & Sun, 2022	Morphology-Colour
Cancer auritus	Fabricius, 1775	Morphology-Shape
Sphenocarcinus auritus	Rathbun, 1916	Morphology-Shape
Lissa aurivilliusi	Rathbun, 1898	People/Scientists
Salmoneus auroculatus	Anker & Marin, 2006	Morphology-Colour
Scyllarus aurora	Holthuis, 1982	Culture/Past
Munidopsis aurora	Osawa, Lin & Chan, 2013	Expeditions
Paramunida aurora	Cabezas & Chan, 2014	Expeditions
Rayllianassa aurora	Poore, 2023	Expeditions
Sphenocarcinus aurorae	Alcock, 1899	Culture/Past
Echinopericlimenes aurorae	Marin & Chan, 2014	Expeditions
Mursia aurorae	Galil & Ng, 2009	Geography
Agononida auscerta	Poore & Andreakis, 2012	Geography
Holthuija aussie	Ng & Richer de Forges, 2015	Geography
Munidopsis austellus	Macpherson, 2007	Geography
Telphusa Austeniana	Wood-Mason, 1871	People/Other
Cherax austini	Coughran & Dobson <i>in</i> Coughran, Dawkins, Hobson & Furse, 2012	People/Scientists
Dromia australasiae	Weber, 1795	Geography
Astacus australasiensis	H. Milne Edwards, 1837	Geography
Hymenosoma australe	Haswell, 1882	Geography
Hippa australe	Hale, 1927	Geography
Solenocera australiana	Pérez Farfante & Grey, 1980	Geography
Macrobrachium australiense	Holthuis, 1950	Geography
Neosarmatium australiense	Ragionieri, Fratini & Schubart, 2012	Geography
Trypaea australiensis	Dana, 1852	Geography
Galathea australiensis	Stimpson, 1858	Geography
Heteropanope australiensis	Stimpson, 1858	Geography
Virbius australiensis	Stimpson, 1860	Geography
Paramithrax (Leptomithrax) australiensis	Miers, 1876	Geography
Petrolisthes (Petrocheles) australiensis	Miers, 1876	Geography
Dromia australiensis	Haswell, 1882	Geography
Dorippe australiensis	Miers, 1884	Geography
Leucosia australiensis	Miers, 1886	Geography
Anapagurus australiensis	Henderson, 1888	Geography
Munida subrugosa var. australiensis	Henderson, 1888	Geography
Latreillia australiensis	Henderson, 1888	Geography
Penaeus canaliculatus var. australiensis	Spence Bate, 1888	Geography
Processa australiensis	Baker, 1907	Geography
Paratya australiensis	Kemp, 1917	Geography
Phalangipus australiensis	Rathbun, 1918	Geography
Amphipalaemon australiensis	Balss, 1921	Geography
Axiopsis (Axiopsis) australiensis	De Man, 1925	Geography
Lyreidus australiensis	Ward, 1933	Geography
Prolybia australiensis	Ward, 1933	Geography
Neoxanthias australiensis	Ward, 1942	Geography
Parapenaeus australiensis	Dall, 1957	Geography
Nephrops australiensis	Bruce, 1966	Geography
Ovalipes australiensis	Stephenson & Rees, 1968	Geography
Mursia australiensis	Campbell, 1971	Geography
Portunus australiensis	Stephenson & Cook, 1973	Geography
Miersiograpsus australiensis	Türkay, 1978	Geography
Alpheus australiensis	Banner & Banner, 1982	Geography
Haliporoides sibogae australiensis	Kensley, Tranter & Griffin, 1987	Geography
Sicyonia australiensis	Hanamura & Wadley, 1998	Geography
Bermudacaris australiensis	Anker & Komai, 2004	Geography
Thenus australiensis	Burton & Davie, 2007	Geography
Lithodes australiensis	Ahyong, 2010	Geography
Thalassina australiensis	Sakai & Türkay, 2012	Geography
Scyllarus australis	Fabricius, 1781	Geography
Inachus australis	Gray, 1831	Geography
Eurynolambrus australis	H. Milne Edwards & Lucas, 1841	Geography
Maia australis	Jacquinot in Jacquinot & Lucas, 1853	Geography
Betaeus australis	Stimpson, 1860	Geography
Myra australis	Haswell, 1879	Geography
Crangon australis	Thomson, 1879	Geography
Pugettia australis	Miers, 1881	Geography
Diptychus australis	Henderson, 1885	Geography
Catapagurus australis	Henderson, 1888	Geography
Pilumnus australis	Whitelegge, 1900	Geography
Merhippolyte australis	Hodgson, 1902	Geography
Alope australis	Baker, 1904	Geography
Trichia australis	Baker, 1906	Geography
Calcinus nitidus var. australis	Bouvier, 1915	Geography
Palaemonetes australis	Dakin, 1915	Geography
Dromidia australis	Rathbun, 1923	Geography
Leptodius australis	Ward, 1936	Geography
Banareiopsis australis	Ward, 1936	Geography
Etisodes australis	Ward, 1936	Geography
Acetes australis	Colefax, 1940	Geography
Rhynchocinetes australis	Hale, 1941	Geography
Cambarus (Faxonius) pellucidus australis	Rhoades, 1941	Geography
Eryoneicus australis	Bernard, 1953	Geography
Macropipus australis	Guinot, 1961	Geography
Engaeus australis	Riek, 1969	Geography
Typton australis	Bruce, 1973	Geography
Callianassa subterranea australis	Kensley, 1974	Geography
Anchistus australis	Bruce, 1977	Geography
Athanopsis australis	Banner & Banner, 1982	Geography
Huenia australis	Griffin & Tranter, 1986	Geography
Leptopisa australis	Griffin & Tranter, 1986	Geography
Pasiphaea australis	Hanamura, 1989	Geography
Eumunida australis	de Saint Laurent & Macpherson, 1990	Geography
Dardanus australis	Forest & Morgan, 1991	Geography
Axianassa australis	Rodrigues & Shimizu, 1992	Geography
Chaceon australis	Manning, 1993	Geography
Sylviocarcinus australis	C Magalhães & Türkay, 1996	Geography
Paracrangon australis	Hanamura, Wadley & Taylor, 1999	Geography
Upogebia australis	Thatje & Gerdes, 2000	Geography
Metacrangon australis	Komai & Taylor, 2010	Geography
Ancylomenes australis	Bruce, 2013	Geography
Anachlorocurtis australis	Ahyong, 2015	Geography
Phylladiorhynchus australis	Schnabel & Ahyong, 2019	Geography
Alpheus australosulcatus	Banner & Banner, 1982	Geography
Parasesarma austrawati	Shahdadi, Davie & Schubart, 2019	Geography
Paratelphusa (Liotelphusa) austrina	Alcock, 1909	Geography
Munida austrina	Macpherson, Rodríguez-Flores & Machordom, 2017	Geography
Petrolisthes lewisi austrinus	Haig, 1960	Geography
Eutrichocheles austrinus	Sakai, 1994	Geography
Emerita austroafricana	Schmitt, 1937	Geography
Processa austroafricana	Barnard, 1947	Geography
Panopeus austrobesus	Williams, 1983	Geography
Dinochelus ausubeli	Ahyong, Chan & Bouchet, 2010	People/Scientists
Galathea autahi	Macpherson & Robainas-Barcia, 2015	Culture/Past
Alpheus avarus	Fabricius, 1798	Other
Diogenes avarus	Heller, 1865	Other
Bathymunida avatea	Macpherson & Baba, 2006	Culture/Past
Conchoecetes avikele	McLay & Naruse, 2019	Ecology/Behaviour
Fredius avilai	Martins, do Nascimento, dos Santos, C Magalhães & Pinheiro, 2021	People/Scientists
Spirontocaris avina	Rathbun, 1899	Morphology-Shape
Penaeus avirostris	Dana, 1852	Morphology-Shape
Galearctus avulsus	Yang, Chen & Chan, 2011	Morphology-Shape
Automate awaji	Komai, Tamego & Hanano, 2020	Geography
Leptalpheus axianassae	Dworschak & Coelho, 1999	Ecology/Host
Sesarma ayatum	Schubart, Reimer & Diesel, 1998	People/Other
Cambarus ayersii	Steele, 1902	People/Scientists
Macrobrachium ayeyarwadiense	Myo, Jayachandran & Khin, 2021	Geography
Lambrus aylthoni	Righi, 1965	People/Scientists
Tehuana ayotzintepecensis	Moreno-Juárez, Villalobos & Álvarez, 2022	Geography
Pseudothelphusa ayutlaensis	Álvarez & Villalobos, 1997	Geography
Typhlocaris ayyaloni	Tsurnamal, 2008	Geography
Indomiscus azadi	Mitra & Khamo, 2024	Other
Eneosesarma azizi	Brösing, Spiridonov, Al-Aidaroos & Türkay, 2014	Other
Alpheopsis azorica	Anker, d'Udekem d'Acoz & Poddoubtchenko, 2005	Geography
Paguristes aztatlanensis	Glassell, 1937	Geography
Medaeus aztec	Davie, 1997	Expeditions
Cambarus aztecus	de Saussure, 1857	Culture/Past
Palaemon aztecus	de Saussure, 1857	Culture/Past
Penaeus brasiliensis var. aztecus	Ives, 1891	Culture/Past
Leptalpheus azuero	Anker, 2011	Geography
Salmoneus babai	Miyake & Miya, 1966	People/Scientists
Munida babai	Tirmizi & Javed, 1976	People/Scientists
Ciliopagurus babai	Forest, 1995	People/Scientists
Uroptychus babai	Ahyong & Poore, 2004	People/Scientists
Galathea babai	Dong & Li, 2010	People/Scientists
Uroptychodes babai	Dong & Li, 2010	People/Scientists
Allogalathea babai	Cabezas, Macpherson & Machordom, 2011	People/Scientists
Munidopsis babai	Osawa, Lin & Chan, 2013	People/Scientists
[truncated: 20,364 more rows]
